# Supplementary material for: Generation of functional ciliated cholangiocytes from human pluripotent stem cells
Source: PubMed Central journal article supplement (PMC8586142; doi:10.1038/s41467-021-26764-0), 2021-11-11

**Generation of functional ciliated cholangiocytes from  
human pluripotent stem cells**

Ogawa et al.

**a**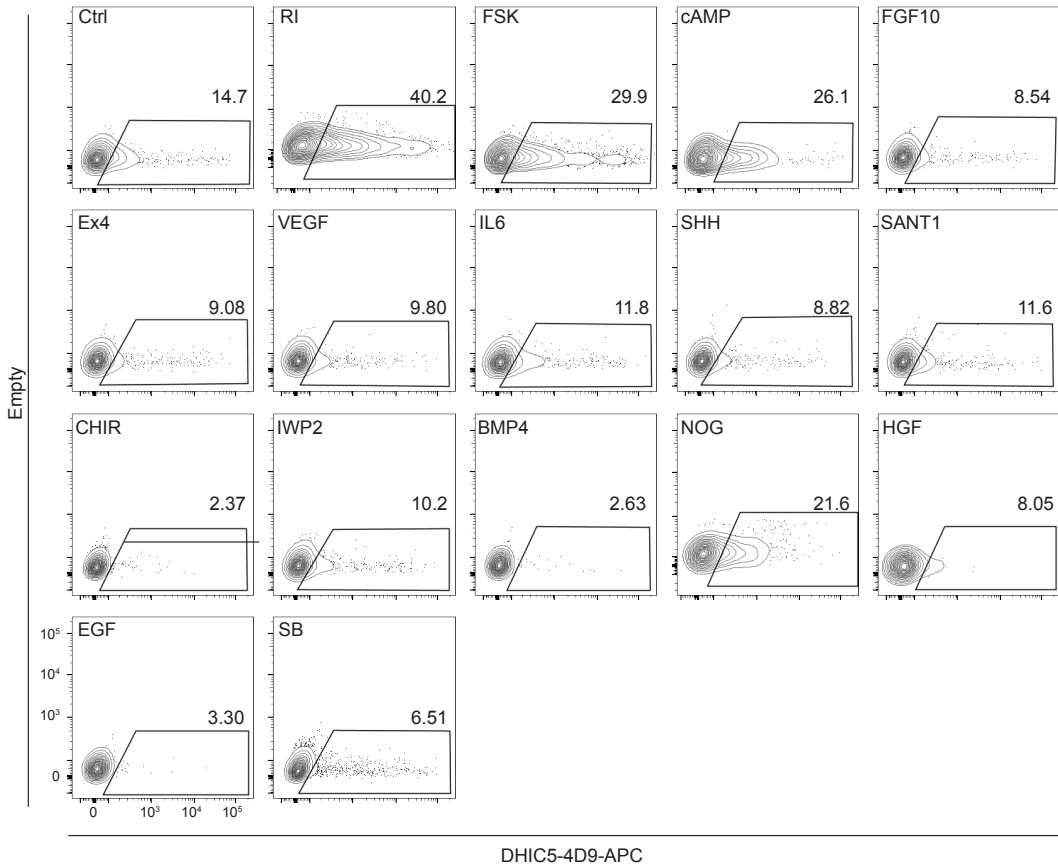**b**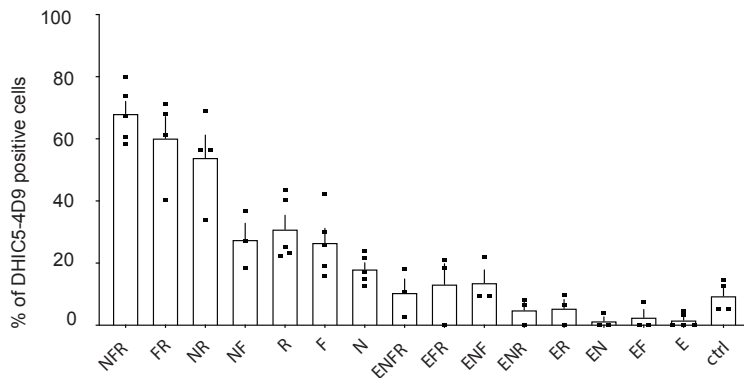**Supplementary Figure 1****Identification of factors which upregulate DHIC5-4D9 expression by Flow cytometry analysis of hPSC-derived cholangiocytes.**

(a) Representative flow cytometry analysis screening of the upregulation of DHIC5-4D9 expression in day 43 hPSC derived cholangiocytes after treatment with different indicated cytokines. (b) Quantification of DHIC5-4D9 positive cells in day 43 hPSC-derived cholangiocytes after treatment with different indicated cytokine combinations (n=3-5). Data are represented as mean  $\pm$  SEM.

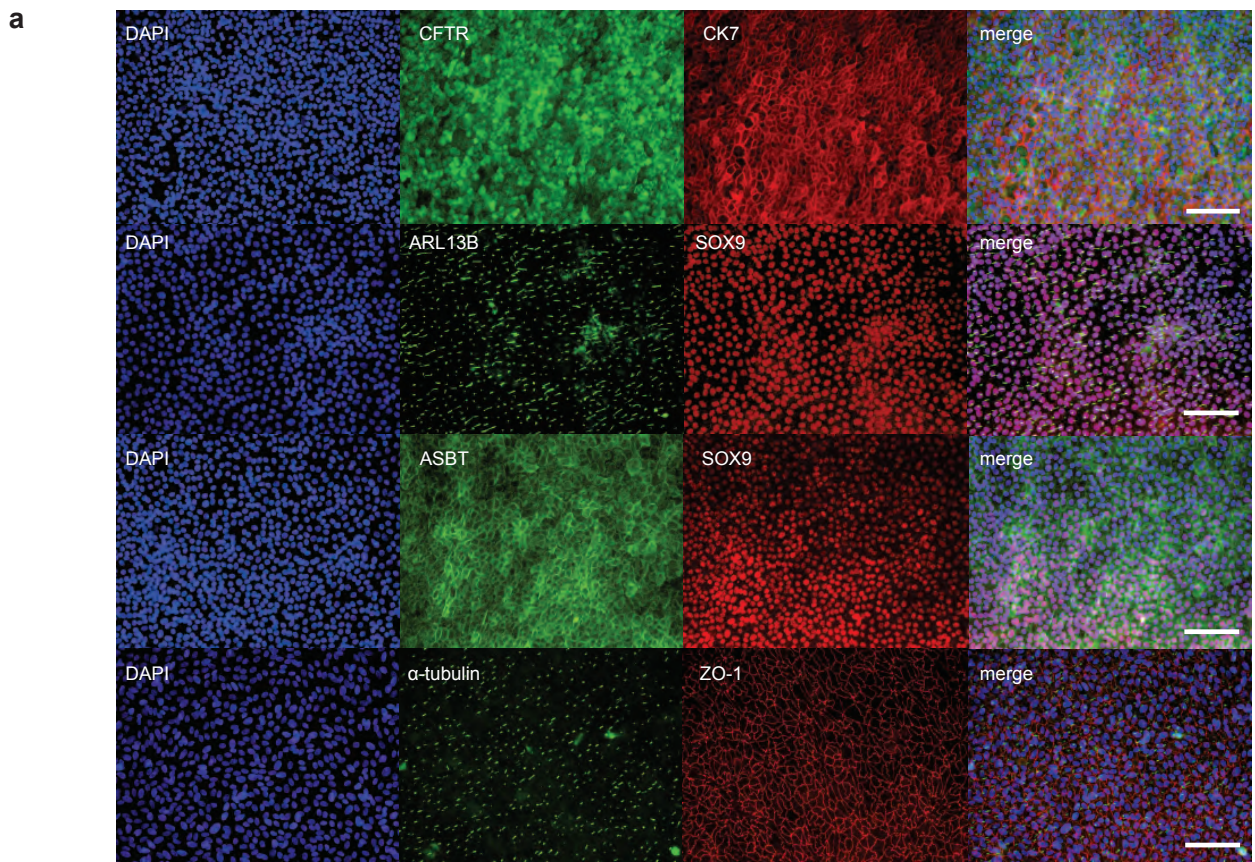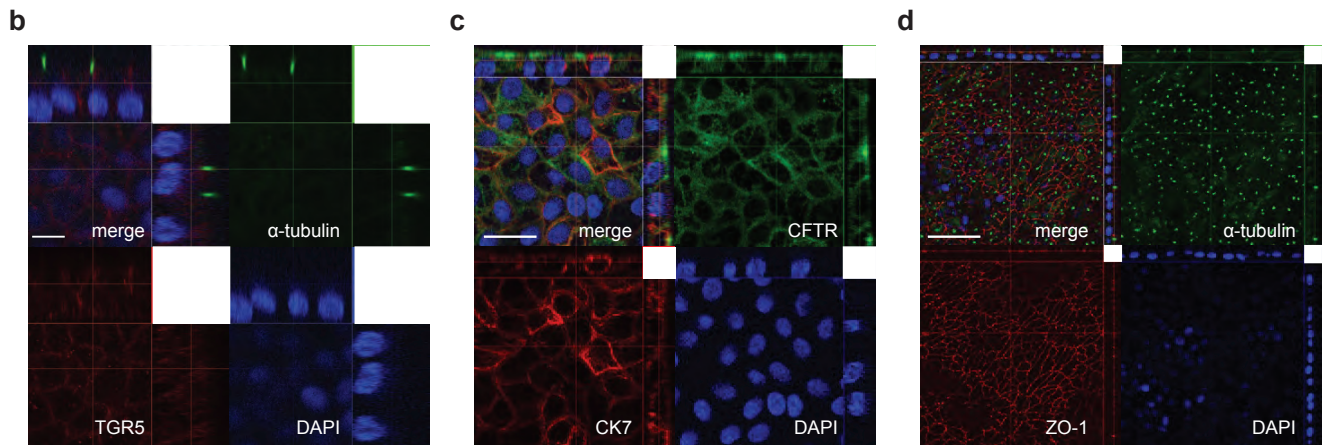

**Supplementary Figure 2**  
**Characterization of hPSC-derived cholangiocytes.**

(a) Immunostaining images of day49 cholangiocytes demonstrating CFTR (green) and CK7 (red) in the top panel. ARL13B (green) and SOX9 (red) in the second from the top, ASBT (green) and SOX9 (red) in the third panel, acetylated  $\alpha$ -tubulin (green) and ZO-1 (red) in the bottom. Scale bar represents 200 $\mu$ m. (b) Side view of immunostaining images of day49 cholangiocytes demonstrating  $\alpha$ -tubulin and TGR5. Scale bar represents 5 $\mu$ m. (c) Side view of immunostaining images of day49 cholangiocytes expressing CFTR and CK7. Scale bar represents 25 $\mu$ m. (d) Side view of immunostaining images of day49 cholangiocytes expressing  $\alpha$ -tubulin and ZO-1. Scale bar represents 50 $\mu$ m.

**a**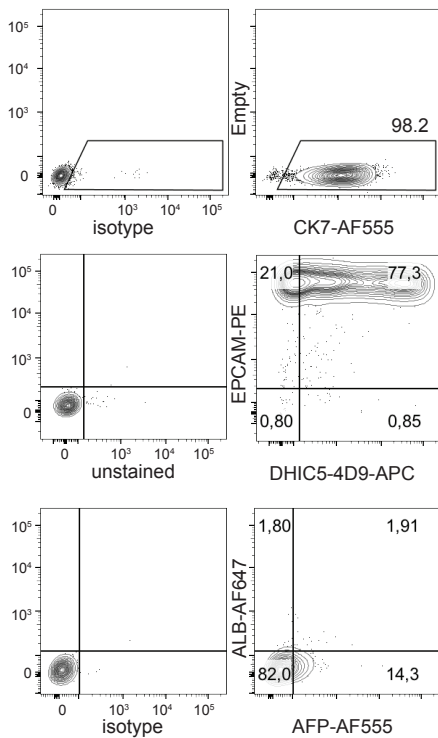**b**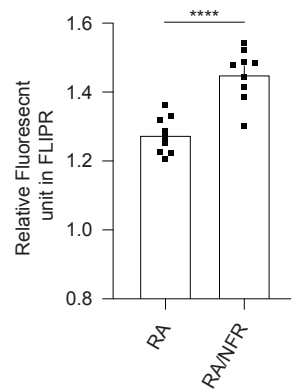

### Supplementary Figure 3 Characterization of hPSC-derived cholangiocytes.

(a) Representative flow cytometry analysis showing CK7 (top), EPCAM and DHIC5-4D9 (middle), and ALB and AFP (bottom) positivity in day49 hPSC-derived cholangiocytes. (b) Quantification of the maximum intensity of Apical Chloride Conductance (ACC) in day 37 and day49 cholangiocytes (n=4). Data are represented as mean ± SEM. \*\*\*\*  $p \leq 0.0001$  two-tailed Student's t-test.

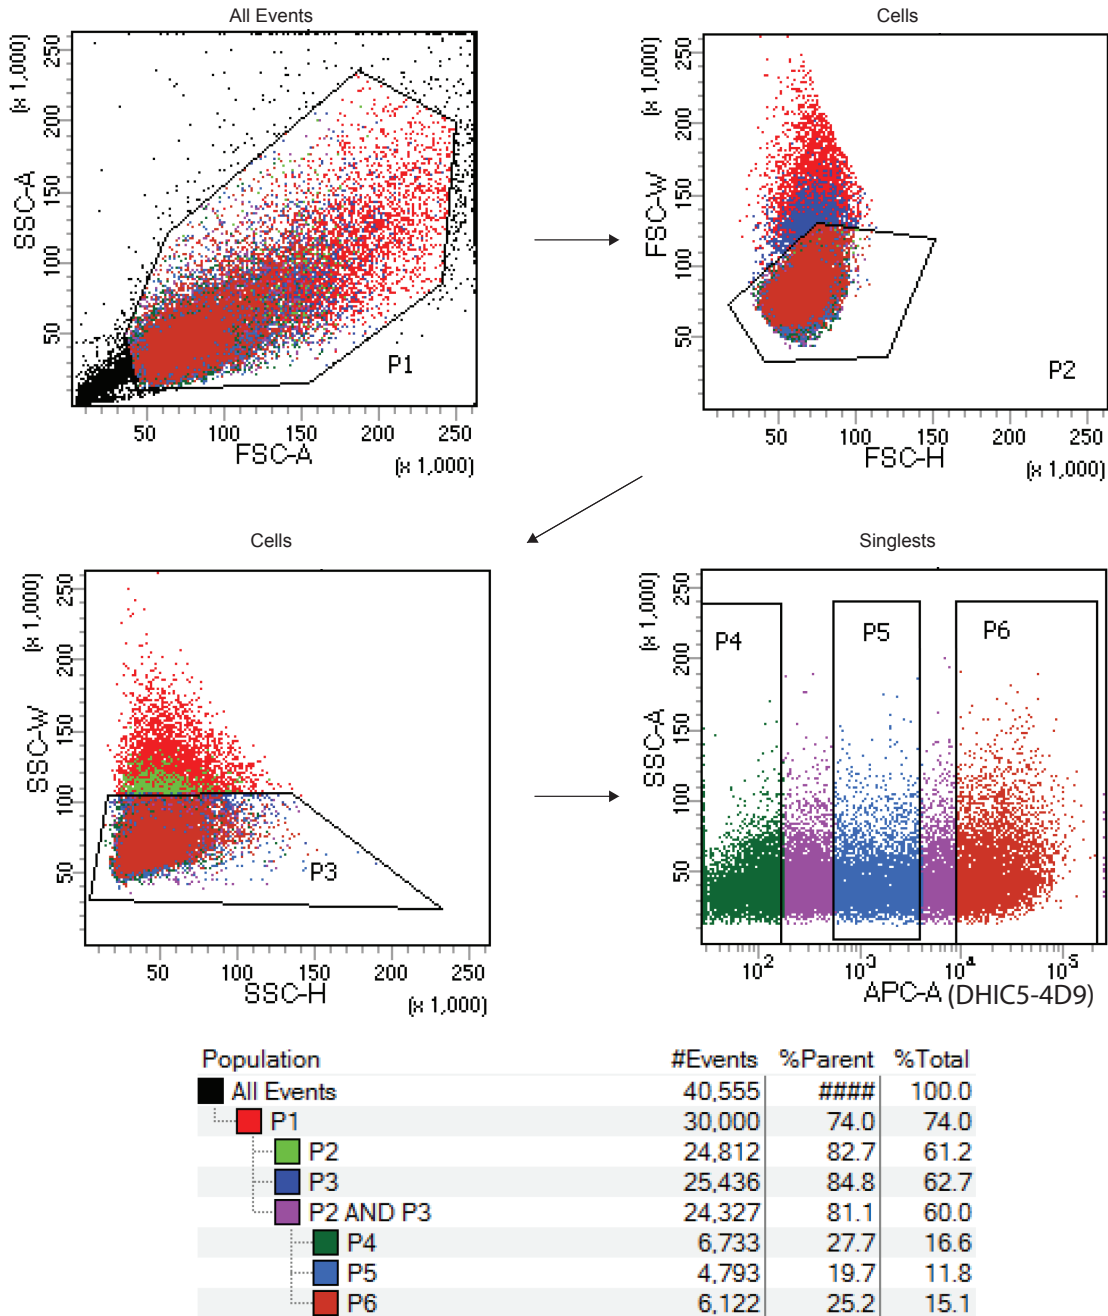

#### Supplementary Figure 4

Cell gating strategy for flow cytometry analysis and cell sorting experiments. APC-A was for DHIC5-4D9. Day49 H9 derived cholangiocytes were sorted for negative (P4) and positive (P6) populations (n=3).

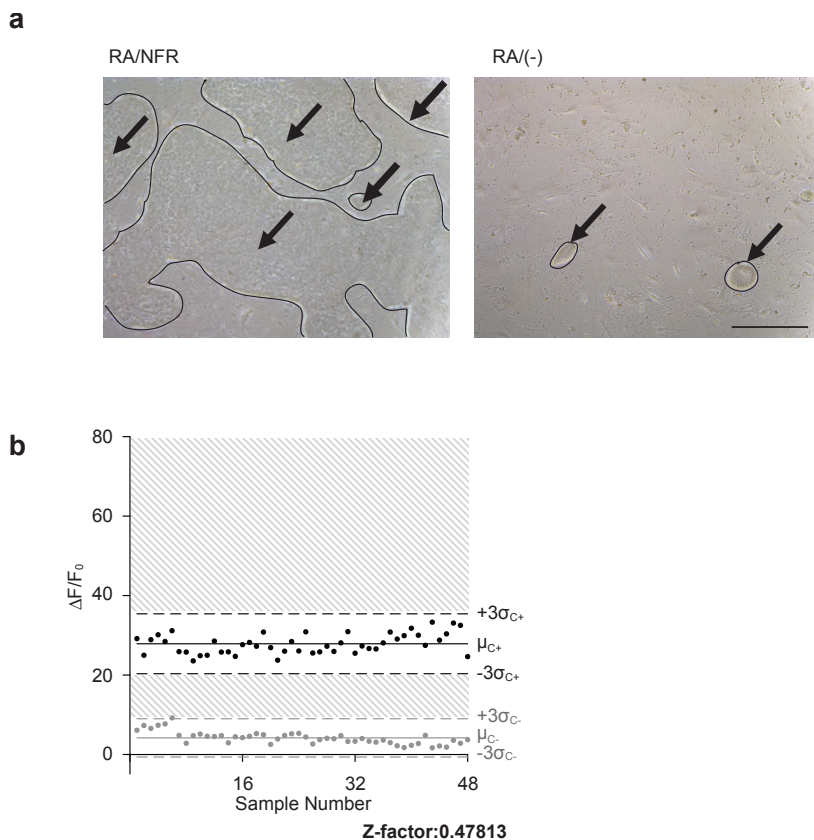

**Supplementary Figure 5**

**Characterization of hPSC-derived cholangiocytes.**

(a) Microphotographic images show the bright field images of day 49 cholangiocytes in the presence of indicated treatments. Line traces and arrows indicate the cholangiocyte colonies. Scale bar represents 500 $\mu$ m. (b) The Z factors show the quality of the FLIPR assay measuring Apical Chloride Conductance (ACC) in 96 well plate with hPSC-derived cholangiocytes at day37.

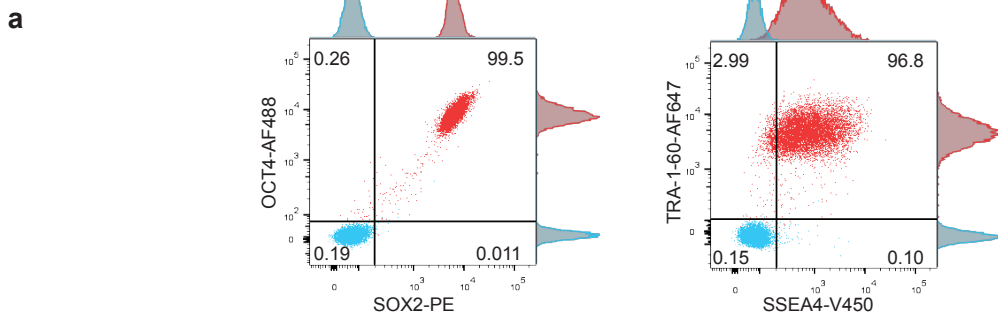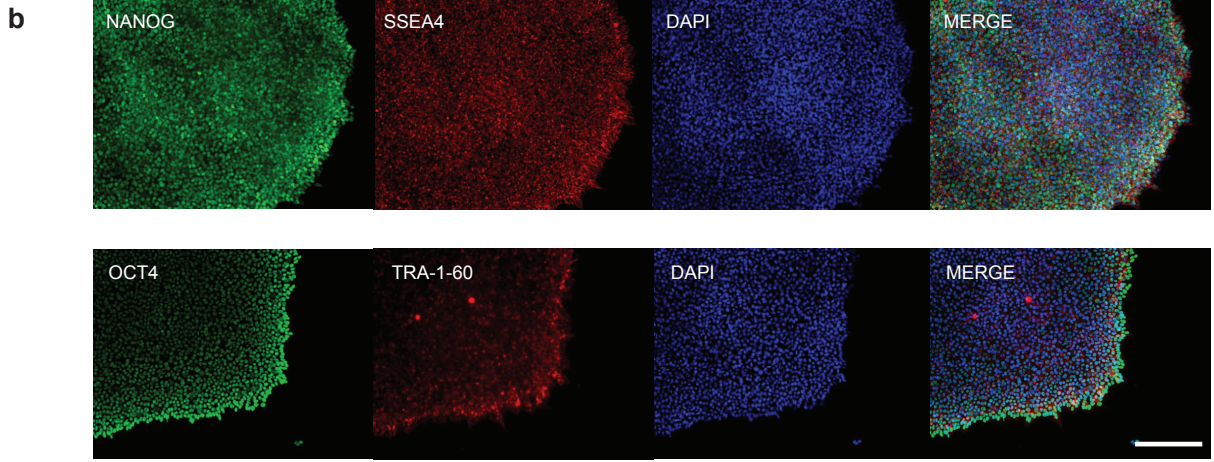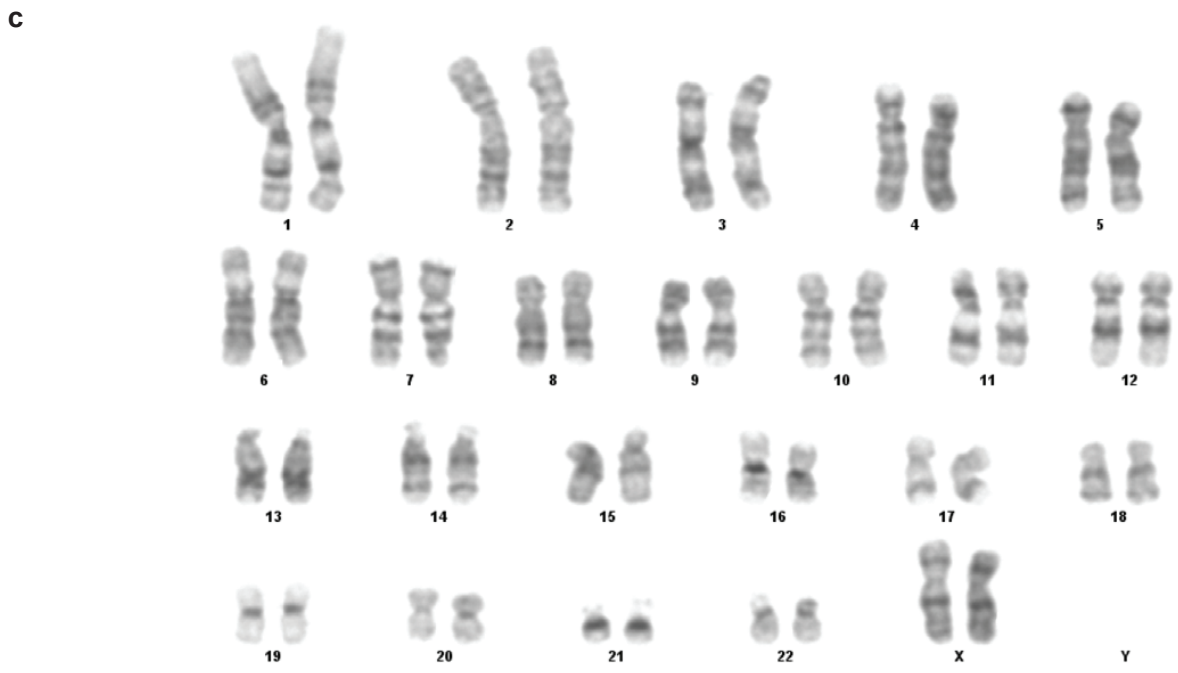

**Supplementary Figure 6**  
**Characterization of WT01 (wild type) iPSCs.**

(a) Representative flow cytometric analysis showing OCT4, SOX2, TRA-1-60, and SSEA4 positivity. (b) Immunostaining images of iPS colony demonstrating pluripotent markers NANOG, and SSEA4 in upper panel, OCT4 and TRA-1-60 in the lower panel. Scale bar represents 400 $\mu$ m. (c) G-banding analysis shows normal karyotype.

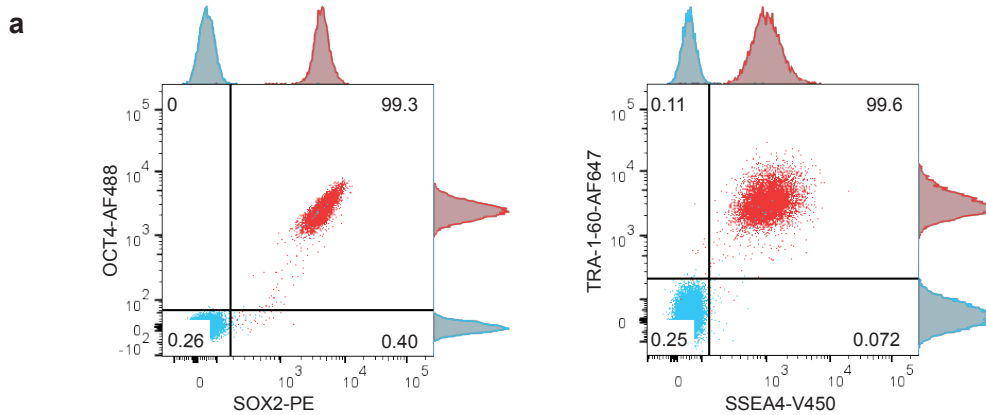

**b**

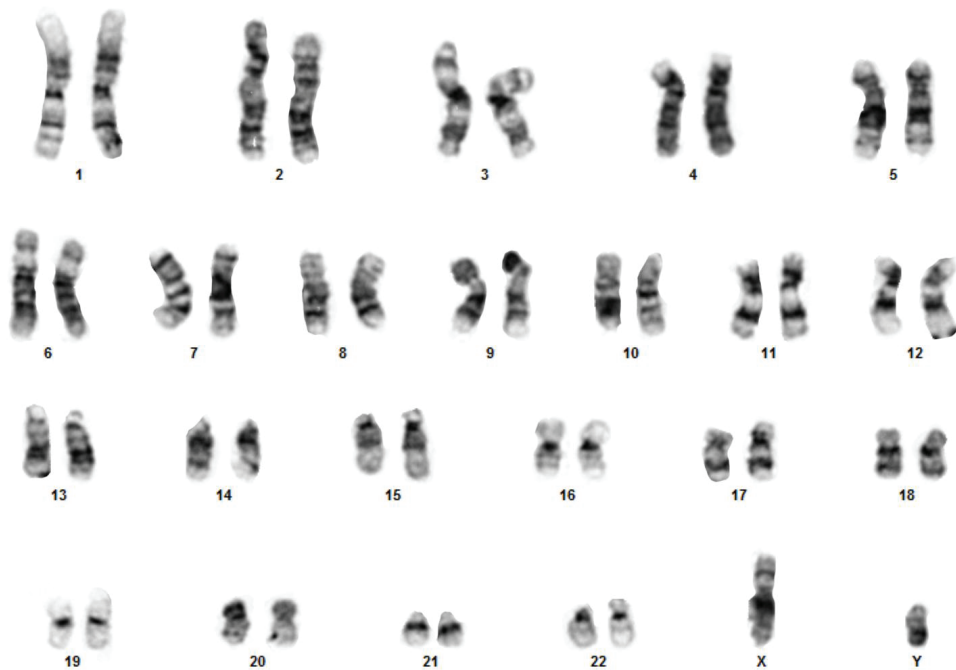

### Supplementary Figure 7

#### Characterization of CF01 (F508del) iPSCs.

(a) Representative flow cytometric analysis showing OCT4, SOX2, TRA-1-60, and SSEA4 positivity. (b) G-banding analysis shows normal karyotype.



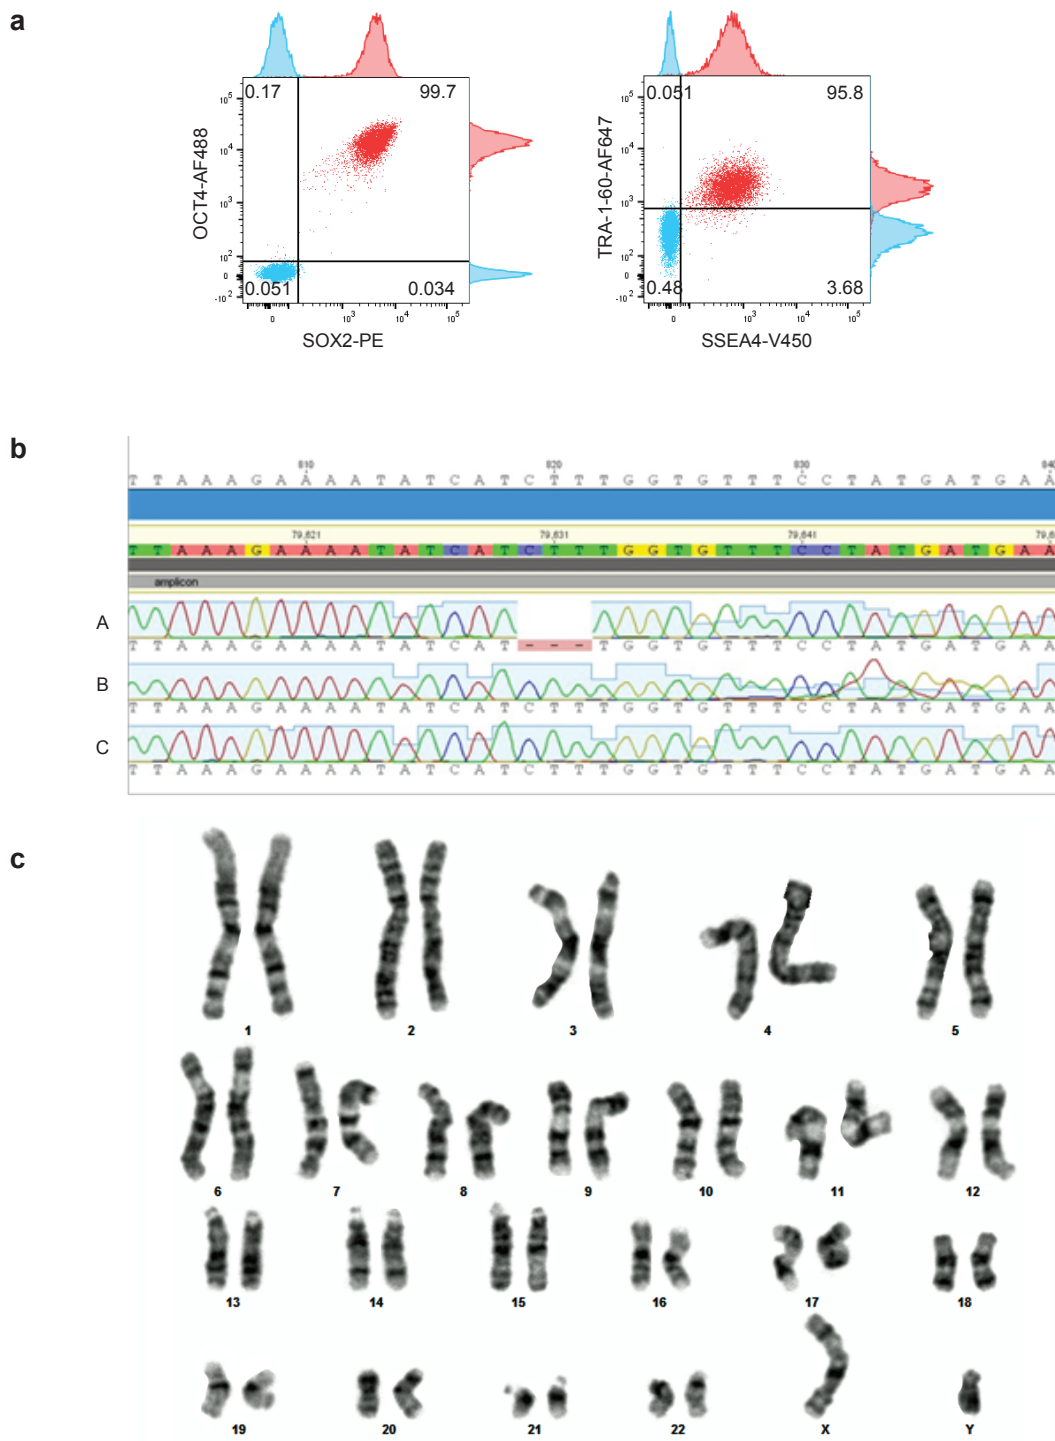

## Supplementary Figure 8

### Characterization of CF01MC (F508del mutation corrected) iPSCs.

(a) Representative flow cytometric analysis showing OCT4, SOX2, TRA-1-60, and SSEA4 positivity. (b) Sequencing of CFTR region of interest from (A) Genomic DNA extracted from CF01 showing cells homozygous for F508del. (B) Genomic DNA extracted from CF01MC corrected line showing cells homozygous for correction to wildtype. (C) Sequencing of (B) after TOPO cloning the CFTR PCR product showing the complete corrected sequence. (c) G-banding analysis shows normal karyotype.

**a**

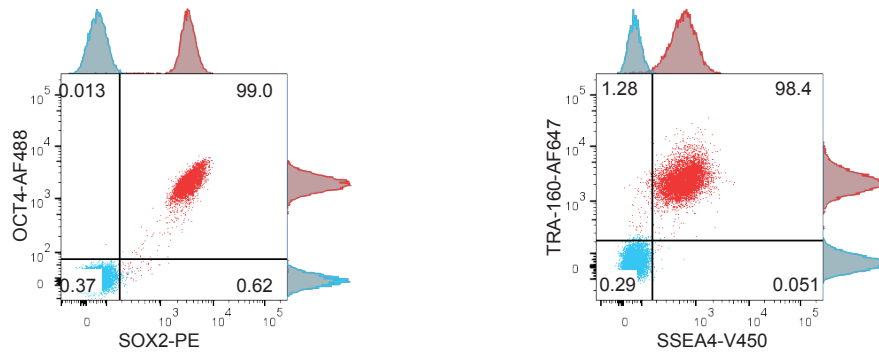

**b**

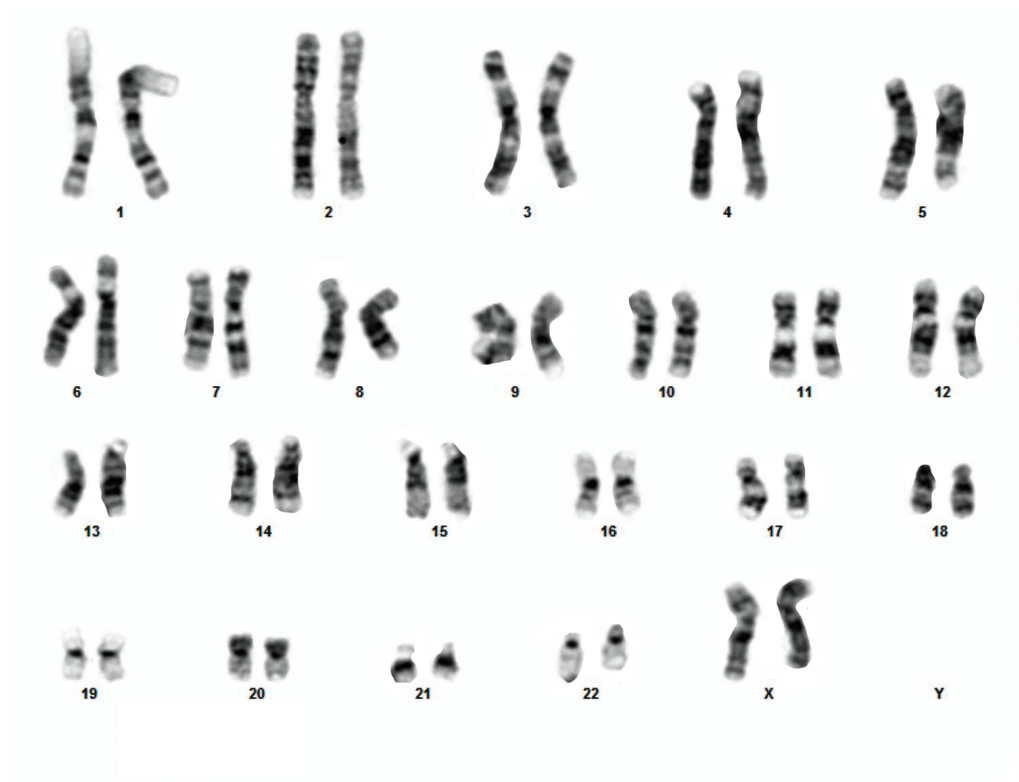

**Supplementary Figure 9**  
**Characterization of CF02 (F508del) iPSCs.**

(a) Representative flow cytometric analysis showing OCT4, SOX2, TRA-1-60, and SSEA4 positivity. (b) G-banding analysis shows normal karyotype.

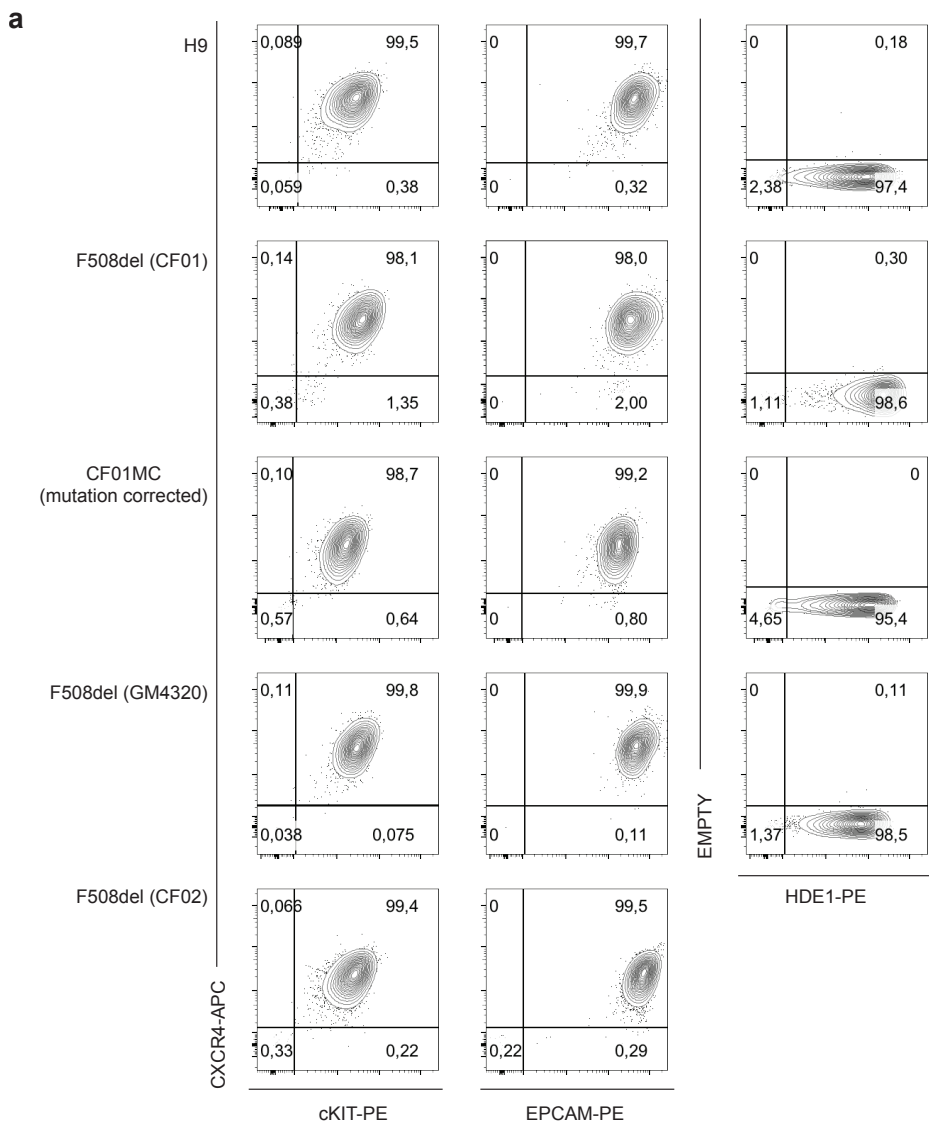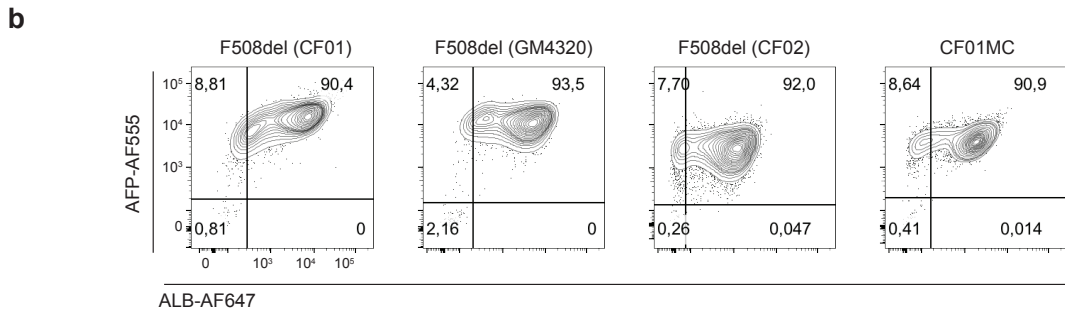

**Supplementary Figure 10**  
**Characterization of hPSC-derived endoderm and hepatoblasts.**

(a) Representative flow cytometry analysis of day9 hPSC-derived endoderm from different cell lines. (b) Representative flow cytometry analysis showing ALB and AFP positivity in day27-33 CF patients-derived hepatoblasts.

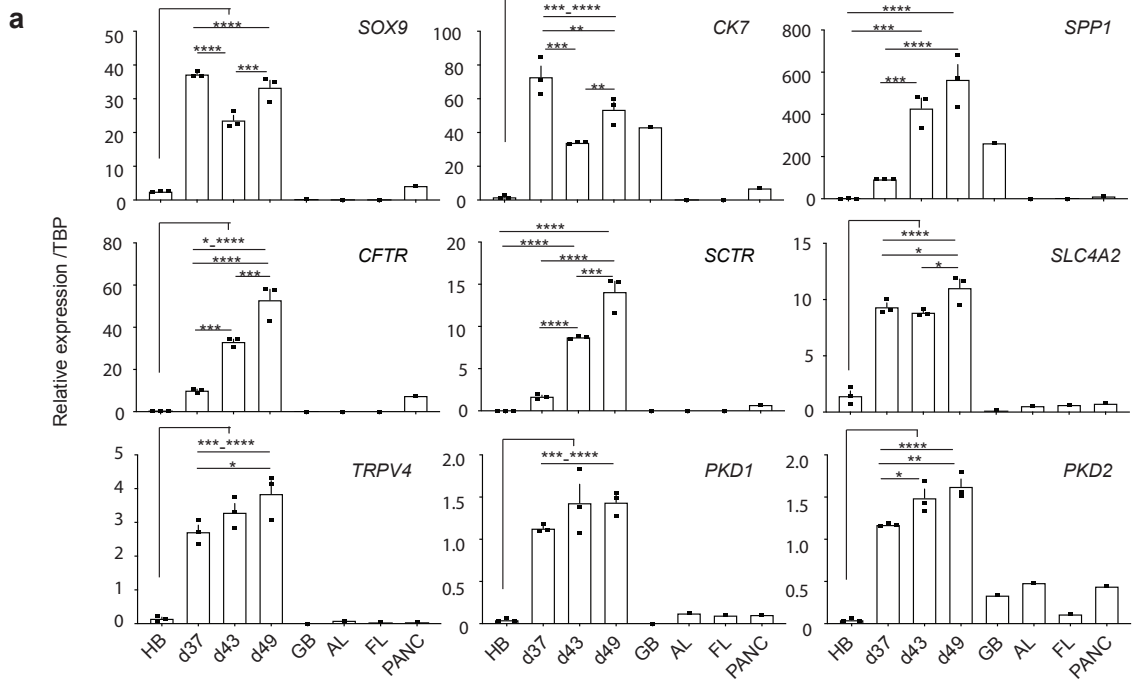

**b**

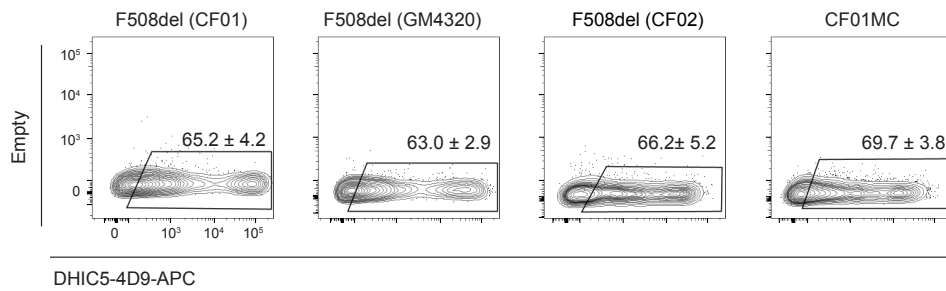

**c**

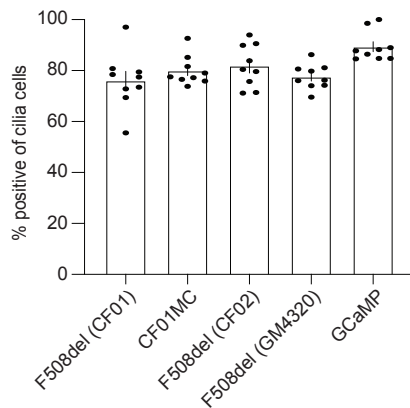

## Supplementary Figure 11

### Characterization of hPSC-derived cholangiocytes.

(a) qPCR analysis shows the expression of indicated genes in different stages of the CF01a (F508del) cholangiocyte differentiation. HB: hepatoblasts, GB: gall bladder, AL: adult liver, FL: fetal liver, PANC: pancreas (n=3). Data are represented as mean  $\pm$  SEM. \* $p \leq 0.05$ , \*\* $p \leq 0.01$ , \*\*\* $p \leq 0.001$ , \*\*\*\* $p \leq 0.001$  one-way ANOVA. (b) Representative flow cytometry analysis showing DHIC5-4D9 positivity in day49 hPSC derived cholangiocytes from day49-55 CF iPSC derived cholangiocytes (n=3-5). Data are represented as mean  $\pm$  SEM. (c) Quantification of cilia positive cells in day49 from different hPSC derived cholangiocytes (n=3). Data are represented as mean  $\pm$  SEM.

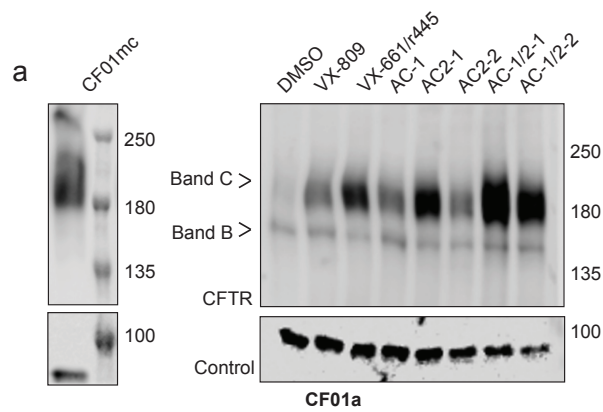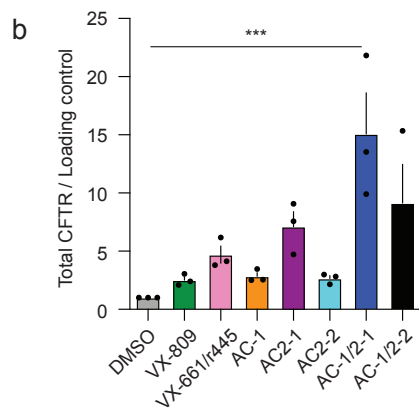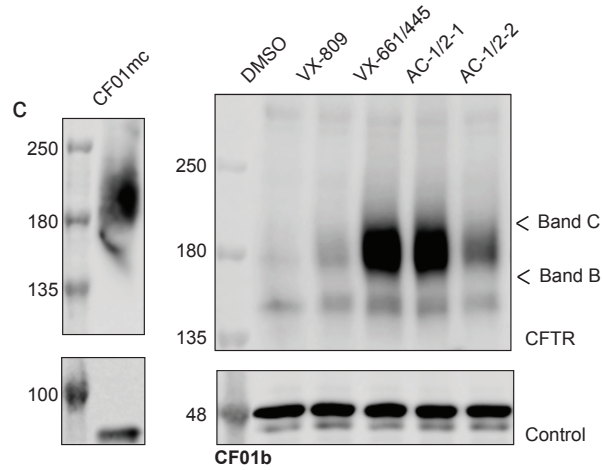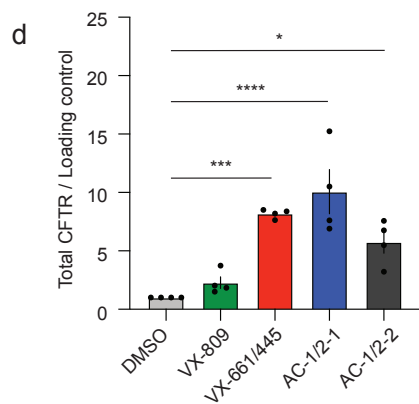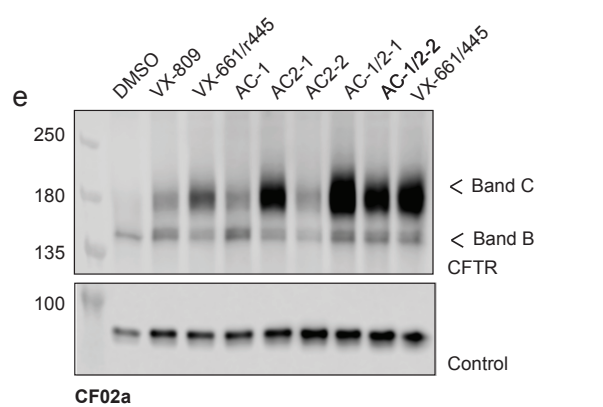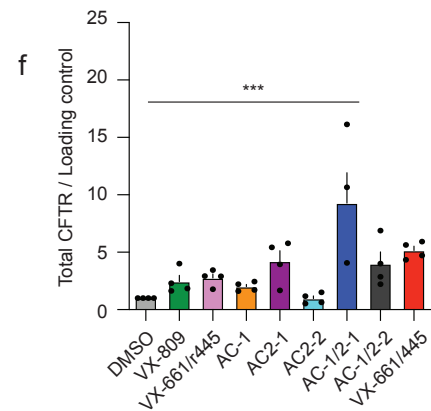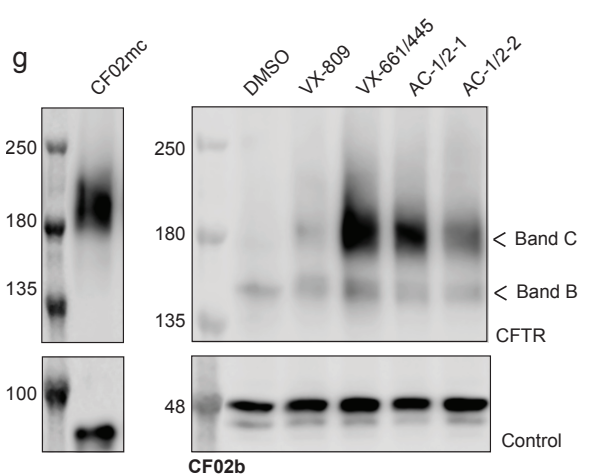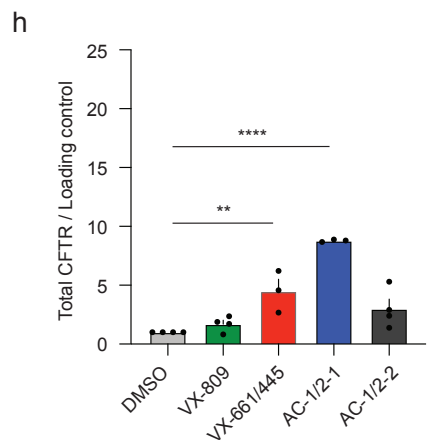

Supplementary Figure 12

## Supplementary Figure 12

### Drug response in CF iPSC-derived cholangiocyte.

(a) Western blotting shows the immature (B) and mature (C) glycosylated CFTR bands after treatment with CFTR modulators in day49 F508del (CF01a) cholangiocyte (right) and CF01MC cholangiocyte (left). (b) Quantification of western blotting of the ratio of mature glycosylated CFTR protein with different CFTR modulators in day49 CF01a patient's iPSC-derived cholangiocytes (n=3). (c) Western blotting shows the immature (B) and mature (C) glycosylated CFTR bands after treatment with CFTR modulators in day49 F508del (CF01b) cholangiocyte (right) and CF01MC cholangiocyte (left). (d) Quantification of western blotting of the ratio of mature glycosylated CFTR protein with different CFTR modulators in day49 CF01b patient's iPSC-derived cholangiocytes (n=4). (e) Western blotting shows the immature and mature glycosylated CFTR bands after treatment with CFTR modulators in day49 F508del (CF02a) cholangiocyte. (f) Quantification of western blotting of the ratio of mature glycosylated CFTR protein with different CFTR modulators in day49 CF02a patient's iPSC-derived cholangiocytes (n=4). (g) Western blotting shows the immature (B) and mature (C) glycosylated CFTR bands after treatment with CFTR modulators in day49 F508del (CF02b) cholangiocyte (right) and CF02MC cholangiocyte (left). (h) Quantification of western blotting of the ratio of mature glycosylated CFTR protein with different CFTR modulators in day49 CF02b patient's iPSC-derived cholangiocytes (n=4). One-way ANOVA. \* $p \leq 0.05$ , \*\* $p \leq 0.01$ , \*\*\* $p \leq 0.001$ , \*\*\*\* $p \leq 0.0001$

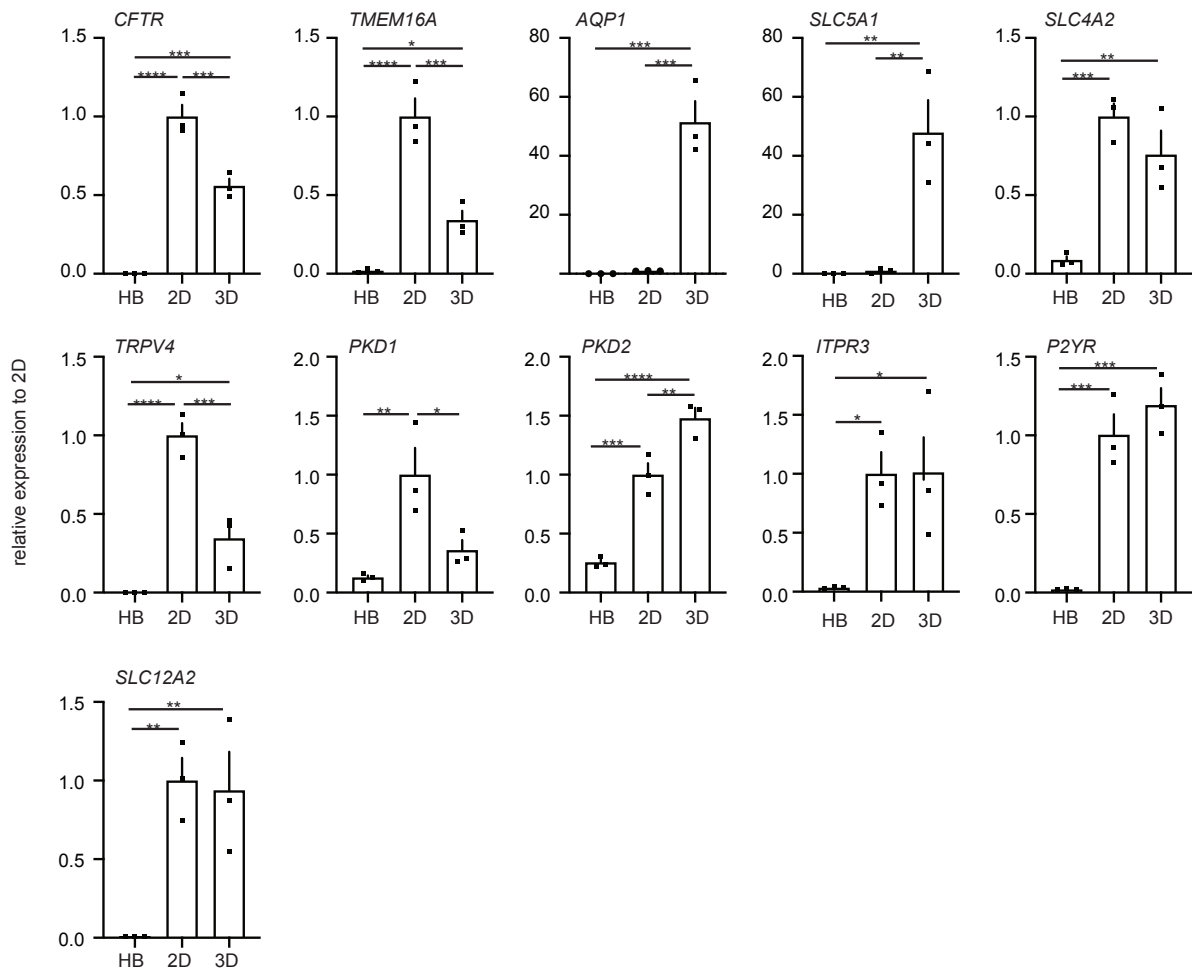

### Supplementary Figure 13

RT-qPCR based expression analysis of indicated genes following 6 days culture with indicated conditions from H9-derived cholangiocyte. HB: day 27 H9 derived hepatoblasts, 2D: day55 monolayer condition, 3D cyst: day55 liquid culture condition, \*  $p \leq 0.05$ , \*\*  $p \leq 0.01$ , \*\*\*  $p \leq 0.001$ , \*\*\*\*  $p \leq 0.0001$  one-way ANOVA. Data are represented as mean  $\pm$  SEM (n=3).



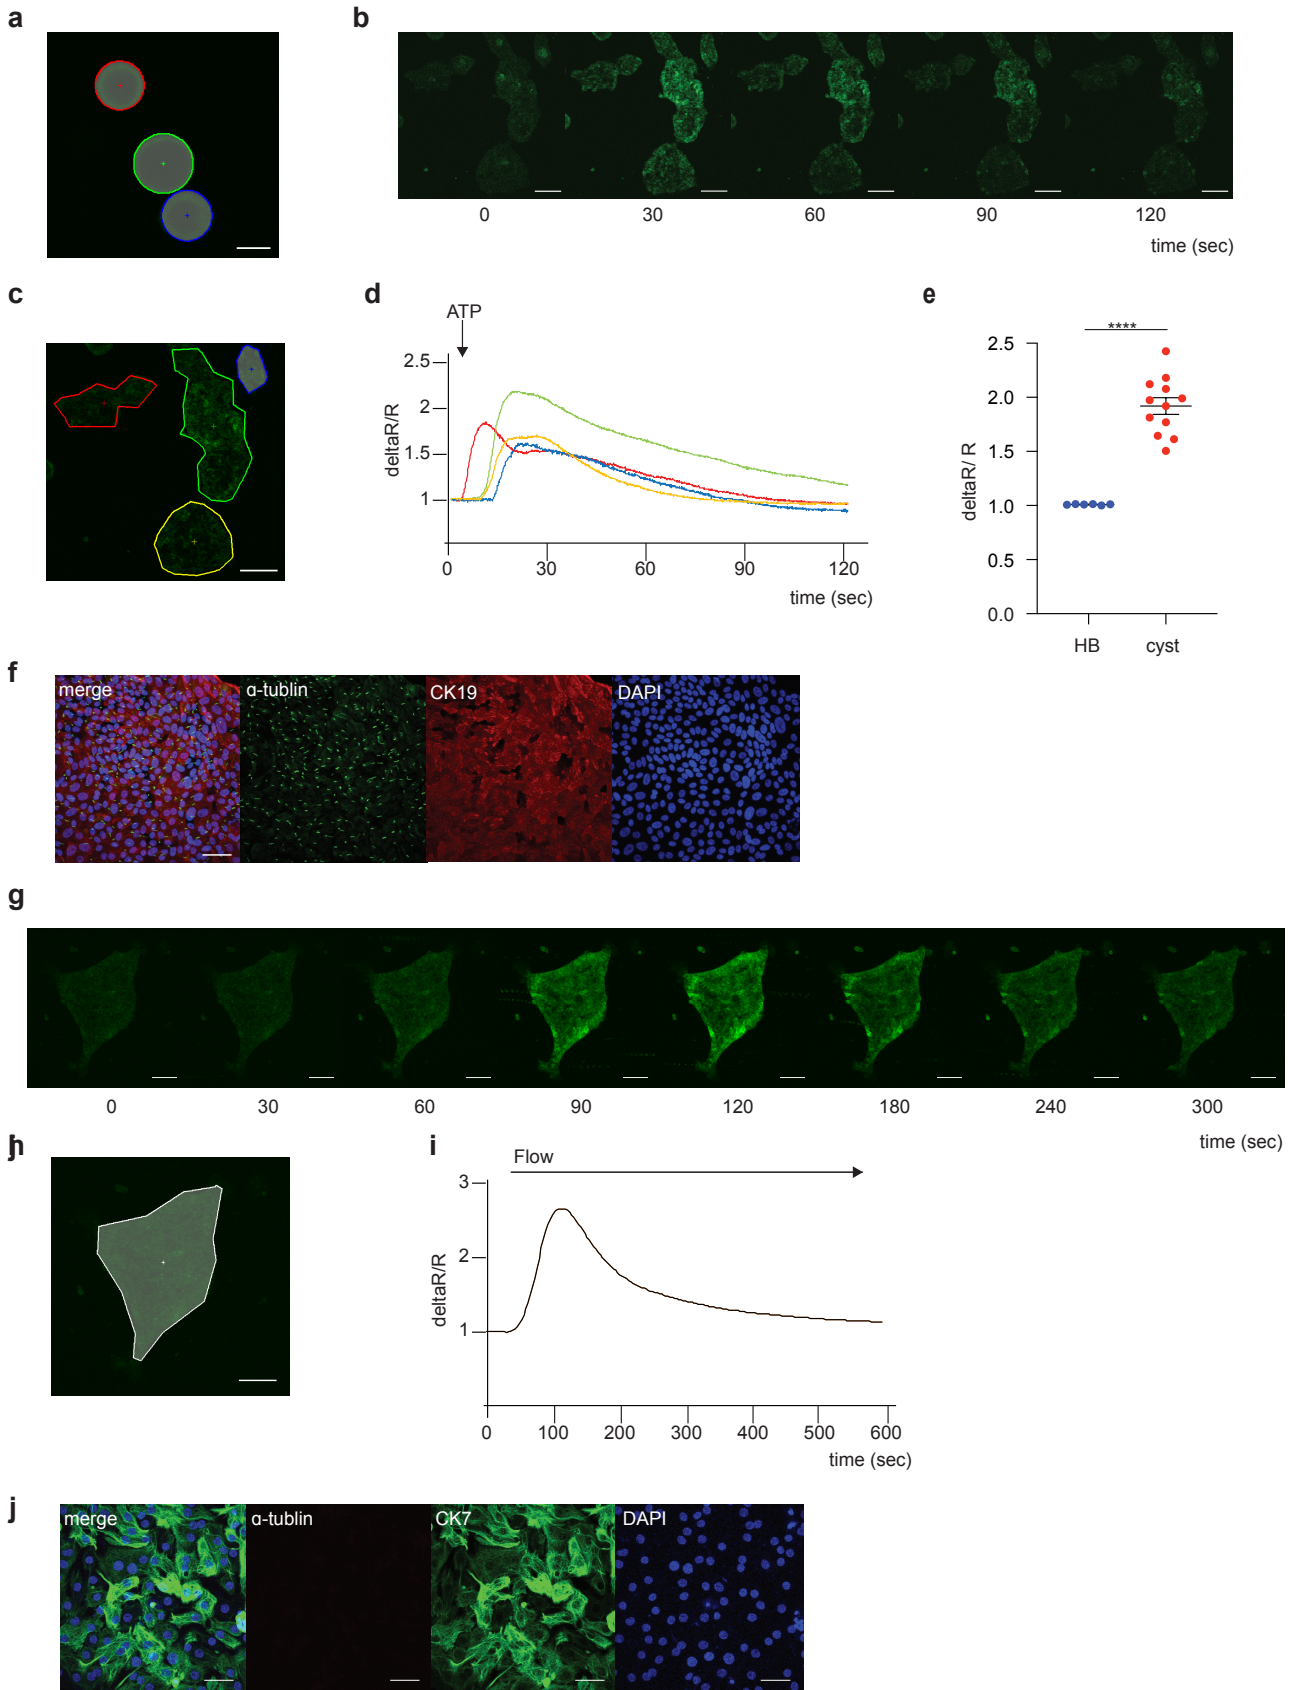

## Supplementary Figure 14

### Intracellular Calcium release in ciliated hPSCs derived cholangiocyte.

(a) The region of interest (ROI)s correspond to GCaMP derived cholangiocyte cysts (3D) in main Figure 6a. Scale bar represents 100  $\mu\text{m}$ . (b) Representative time lapse images of calcium influx in plated down 3D cholangiocyte cysts from GCaMP hESC in response to ATP. Scale bar represents 100 $\mu\text{m}$ . (c) The ROIs mark the GCaMP derived plated down cholangiocyte cysts. Scale bar represents 100  $\mu\text{m}$ . (d) Representative traces showing the intracellular calcium release in plated down cholangiocyte cysts from GCaMP hESC in the response to ATP. The colors of the traces correspond to those for the ROIs in (c). (e) Quantification of maximum fluorescent intensity representing intracellular calcium release in plated down 3D hepatoblast and 3D cholangiocyte cysts from GCaMP hESC in the response to ATP (HB n=4, chol n=3). Data are represented as mean  $\pm$  SEM. \*\*\*\*  $p \leq 0.0001$  two-tailed Student's t-test. (f) Representative microscopic images of plate down 3D cholangiocyte cysts (GCaMP hESC) exhibiting primary cilia (green) and CK19 (red). Scale bar represents 50 $\mu\text{m}$ . (g) Representative time lapse images of calcium influx in plated down 3D cholangiocyte cysts from GCaMP hESC in the response to flow. Scale bar represents 100 $\mu\text{m}$ . (h) The ROIs mark the GCaMP derived plated down cholangiocyte cysts. Scale bar represents 100  $\mu\text{m}$ . (i) Representative trace of the intra cellular calcium release in plated down 3D cholangiocyte cysts from GCaMP hESC in the response to flow correspond to the ROI in (h). (j) Representative microscopic images of non-ciliated CK7 positive cholangiocytes derived from GCaMP hESC. Scale bar represents 50 $\mu\text{m}$ .



## Supplementary Figure 15

### Global gene analysis of hPSC-derived cholangiocytes in monolayer (2D) and cyst (3D).

(a) Dot plots displaying the top 5 genes in the 12 clusters of hPSC-derived cholangiocyte. (b) UMAP plots showing the expression of core cholangiocyte genes. (c) UMAP plots showing the expression of cell cycle genes including *BRCA2*, *CDC6*, and *CDK1*. (d) UMAP plots showing the expression of primary cilia target genes. (e) Dot plots displaying the top 10 genes of monolayer (2D) dominant, cyst (3D) dominant, and combine (2D and 3D) populations. Size of the dot represents proportion of the population that express each gene. Color indicates the average expression level. (f) Gene ontology analysis (biological process) of monolayer (2D) dominant, cyst (3D) dominant, and combine (2D and 3D) populations.

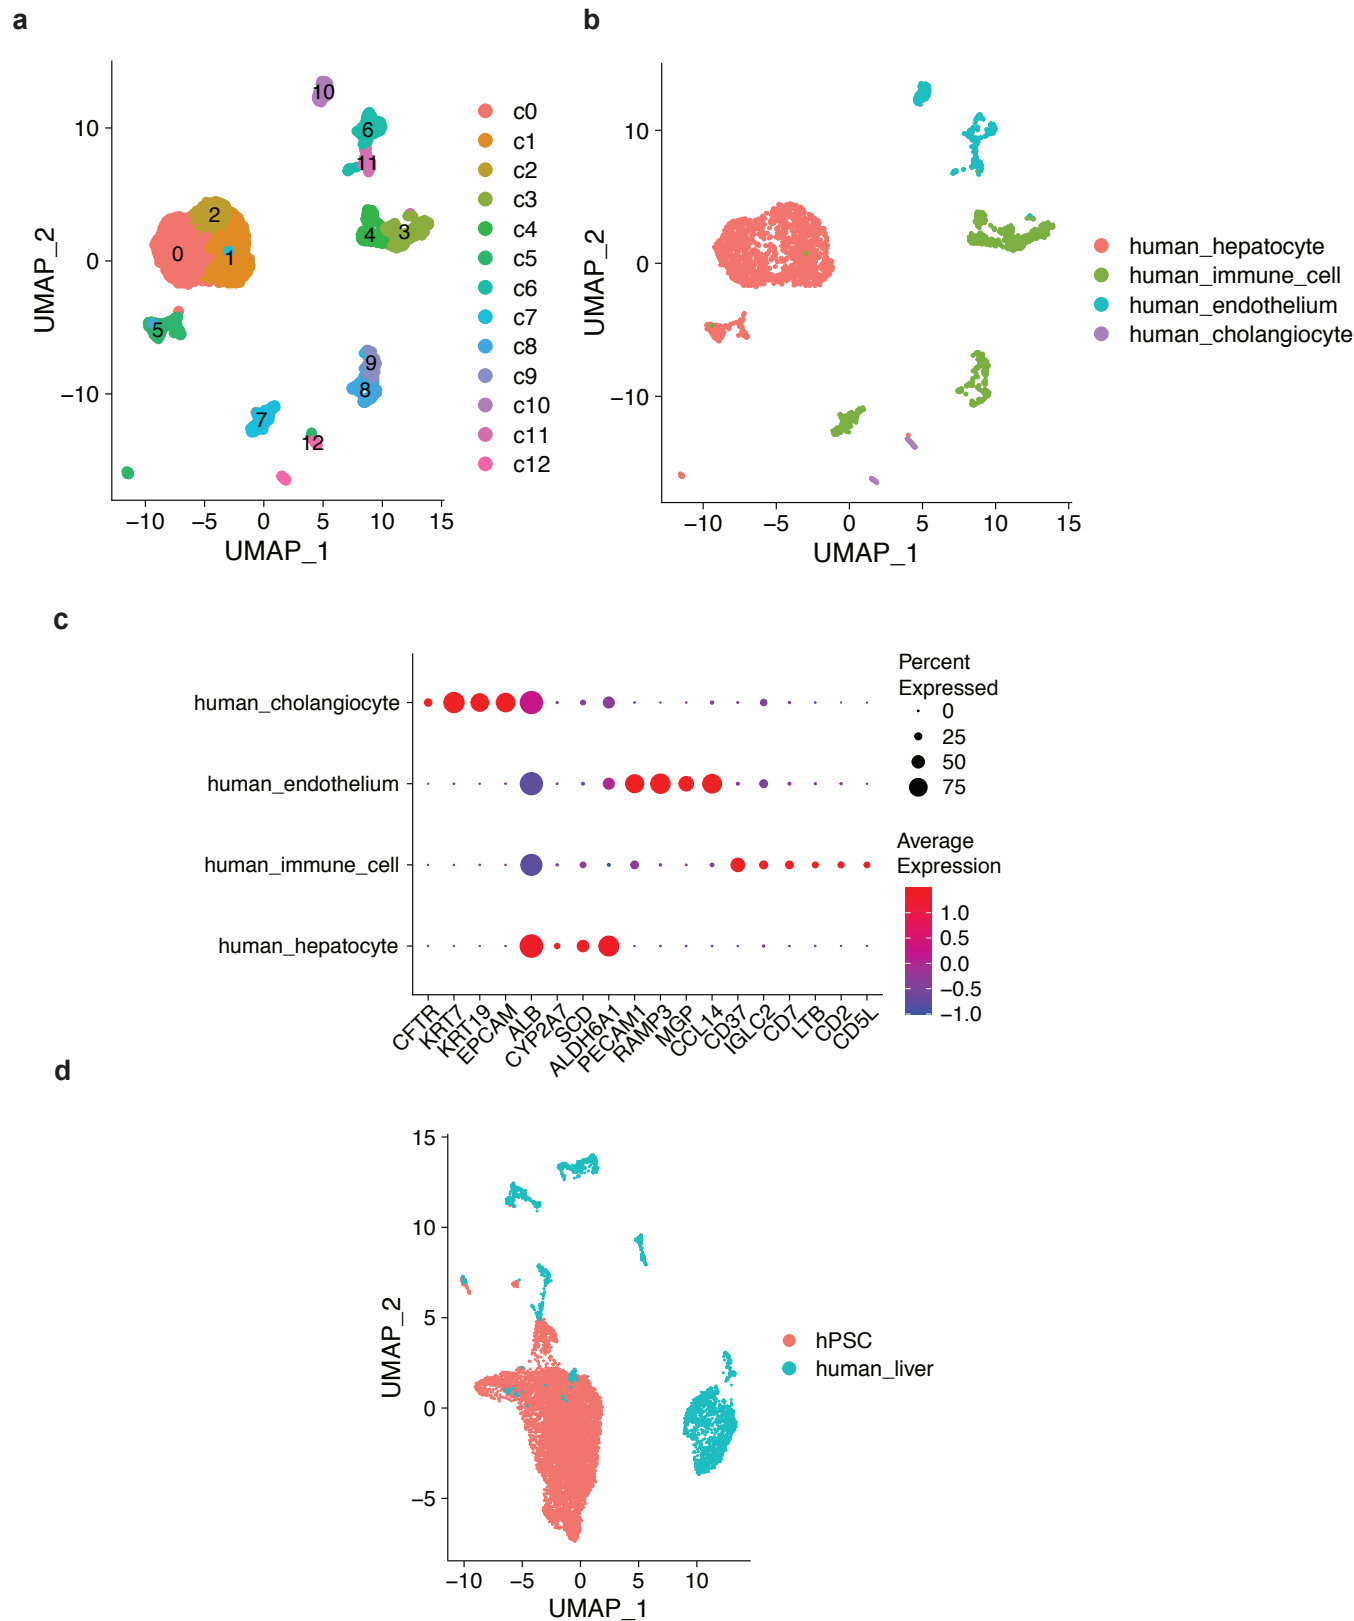

## Supplementary Figure 16

### Global gene analysis of human adult liver.

(a) UMAP projection of human adult liver cells labelled by cell cluster. (b) UMAP projection of human hepatocyte, immune cell, endothelium and cholangiocyte. (c) Dot plots displaying the representative core genes in the 4 main cell types in the human adult liver dataset. (d) UMAP projection of the integrated hPSC-derived cholangiocyte and human adult liver data.

## Supplementary Tables

**Supplementary Table 1.** Cell cycle status in hPSC-derived cholangiocyte clusters.

| ClusterID | G1   | G2M | S   |
|-----------|------|-----|-----|
| 0         | 1444 | 24  | 401 |
| 1         | 1171 | 8   | 373 |
| 2         | 915  | 18  | 310 |
| 3         | 677  | 42  | 498 |
| 4         | 740  | 16  | 95  |
| 5         | 454  | 4   | 31  |
| 6         | 305  | 9   | 44  |
| 7         | 0    | 209 | 131 |
| 8         | 90   | 9   | 3   |
| 9         | 8    | 0   | 23  |
| 10        | 22   | 0   | 1   |
| 11        | 17   | 0   | 3   |

**Supplementary Table 2.** Quantification of cell distribution of monolayer and cyst population in 2D dominant, 3D dominant and combine clusters.

|                                | <b>2D</b>          | <b>3D</b>          |
|--------------------------------|--------------------|--------------------|
| <b>Chol_combine</b>            | 0.715580239695995  | 0.284419760304005  |
| <b>Chol_3D_dominant</b>        | 0.293089430894309  | 0.706910569105691  |
| <b>Chol_2D_dominant</b>        | 0.979321753515302  | 0.0206782464846981 |
| <b>Chol_hepatic_progenitor</b> | 0.0143149284253579 | 0.985685071574642  |
| <b>Chol_proliferative_cell</b> | 0.697058823529412  | 0.302941176470588  |
| <b>GI secretory cell (c8)</b>  | 0.382352941176471  | 0.617647058823529  |
| <b>GI secretory cell (c9)</b>  | 0                  | 1                  |
| <b>GI secretory cell (c10)</b> | 0.0869565217391304 | 0.91304347826087   |
| <b>GI secretory cell (c11)</b> | 0.5                | 0.5                |

**Supplementary Table 3.** Pearson correlation coefficient between hPSC-derived cholangiocyte clusters and human adult liver clusters (related to Figure 8h).

|                                | Chol_combine           | Chol_3D_dominant      | Chol_2D_dominant       | Chol_proliferative_cell | GI_secretory_cell (c8) | GI_secretory_cell (c11) | Chol_hepatic_progenitor | GI_secretory_cell (c10) | GI_secretory_cell (c9) | human_cholangiocyte    | human_immune_cell      | human_hepatocyte       | human_endothelium     |
|--------------------------------|------------------------|-----------------------|------------------------|-------------------------|------------------------|-------------------------|-------------------------|-------------------------|------------------------|------------------------|------------------------|------------------------|-----------------------|
| <b>Chol_combine</b>            | 1                      | 0.86556759<br>9273305 | 0.93700360<br>6412429  | 0.906610728<br>950812   | 0.43100485<br>9719989  | 0.38331469<br>5051695   | 0.5475343213<br>68245   | 0.09864341<br>69503258  | 0.40668996<br>0931043  | 0.297603094<br>180693  | 0.28959365<br>8647243  | 0.12424965<br>9707914  | 0.24315928<br>624624  |
| <b>Chol_3D_dominant</b>        | 0.86556759<br>273305   | 1                     | 0.79644178<br>858359   | 0.868802133<br>962525   | 0.44905622<br>6666486  | 0.53175091<br>3894766   | 0.7454891125<br>76346   | 0.14019755<br>2322878   | 0.56535226<br>7777755  | 0.444857758<br>97689   | 0.46753363<br>3339467  | 0.19975365<br>3393421  | 0.37505424<br>2030586 |
| <b>Chol_2D_dominant</b>        | 0.93700360<br>6412429  | 0.79644178<br>8858359 | 1                      | 0.856940299<br>113817   | 0.61223231<br>5623656  | 0.37932508<br>9047852   | 0.5700987456<br>16535   | 0.08867864<br>71406535  | 0.43839131<br>8525312  | 0.265134805<br>03985   | 0.29666210<br>6728521  | 0.10628557<br>2557229  | 0.26865800<br>3327273 |
| <b>Chol_proliferative_cell</b> | 0.90661072<br>8950812  | 0.8688021<br>33962525 | 0.85694029<br>9113817  | 1                       | 0.44382163<br>6658391  | 0.41449221<br>2504687   | 0.5886892061<br>49809   | 0.10097567<br>7919983   | 0.45910038<br>5560331  | 0.340901167<br>03361   | 0.29182458<br>9744359  | 0.13893413<br>8026821  | 0.25126452<br>9639942 |
| <b>GI_secretory_cell (c8)</b>  | 0.43100485<br>9719989  | 0.4490562<br>26666486 | 0.61223231<br>5623656  | 0.443821636<br>658391   | 1                      | 0.27998121<br>5033299   | 0.4469197386<br>71561   | 0.06081163<br>98217735  | 0.36402599<br>1323051  | 0.173397558<br>116614  | 0.25907606<br>3199433  | 0.05960731<br>16562302 | 0.3332028<br>2852697  |
| <b>GI_secretory_cell (c11)</b> | 0.38331469<br>5051695  | 0.5317509<br>13894766 | 0.37932508<br>9047852  | 0.414492212<br>504687   | 0.27998121<br>5033299  | 1                       | 0.4956777175<br>29169   | 0.09761091<br>80764678  | 0.37762209<br>0867502  | 0.236782644<br>686379  | 0.42949291<br>8334866  | 0.13002610<br>0026159  | 0.30238528<br>4628785 |
| <b>Chol_hepatic_progenitor</b> | 0.54753432<br>1368245  | 0.7454891<br>12576346 | 0.57009874<br>5616535  | 0.588689206<br>149809   | 0.44691973<br>8671561  | 0.49567771<br>7529169   | 1                       | 0.15490516<br>6796591   | 0.60609570<br>50663    | 0.374434286<br>222846  | 0.47726385<br>8278797  | 0.22132379<br>9677211  | 0.35432527<br>070485  |
| <b>GI_secretory_cell (c10)</b> | 0.09864341<br>69503258 | 0.1401975<br>52322878 | 0.08867864<br>71406535 | 0.100975677<br>919983   | 0.06081163<br>98217735 | 0.09761091<br>80764678  | 0.1549051667<br>96591   | 1                       | 0.07677364<br>22908112 | 0.073554043<br>1667983 | 0.07928333<br>46798614 | 0.10020452<br>6723651  | 0.06023966<br>7974537 |
| <b>GI_secretory_cell (c9)</b>  | 0.40668996<br>0931043  | 0.5653522<br>67777755 | 0.43839131<br>8525312  | 0.459100385<br>560331   | 0.36402599<br>1323051  | 0.37762209<br>0867502   | 0.6060957050<br>663     | 0.07677364<br>22908112  | 1                      | 0.219836250<br>585716  | 0.37076989<br>7974125  | 0.08279371<br>91648274 | 0.28392671<br>2975513 |
| <b>human_cholangiocyte</b>     | 0.29760309<br>4180693  | 0.4448577<br>5897689  | 0.26513480<br>503985   | 0.340901167<br>03361    | 0.17339755<br>8116614  | 0.23678264<br>4686379   | 0.3744342862<br>22846   | 0.07355404<br>31667983  | 0.21983625<br>0585716  | 1                      | 0.22816288<br>8010546  | 0.53519187<br>0324963  | 0.30329768<br>8992009 |
| <b>human_immune_cell</b>       | 0.28959365<br>8647243  | 0.4675336<br>33339467 | 0.29666210<br>6728521  | 0.291824589<br>744359   | 0.25907606<br>3199433  | 0.42949291<br>8334866   | 0.4772638582<br>78797   | 0.07928333<br>46798614  | 0.37076989<br>7974125  | 0.228162888<br>010546  | 1                      | 0.15436464<br>31444    | 0.44031845<br>4863807 |
| <b>human_hepatocyte</b>        | 0.12424965<br>9707914  | 0.1997536<br>53393421 | 0.10628557<br>2557229  | 0.138934138<br>026821   | 0.05960731<br>16562302 | 0.13002610<br>0026159   | 0.2213237996<br>77211   | 0.10020452<br>6723651   | 0.08279371<br>91648274 | 0.535191870<br>324963  | 0.15436464<br>31444    | 1                      | 0.26390975<br>7481258 |
| <b>human_endothelium</b>       | 0.24315928<br>624624   | 0.3750542<br>42030586 | 0.26865800<br>3327273  | 0.251264529<br>639942   | 0.3332028<br>2852697   | 0.30238528<br>4628785   | 0.3543252707<br>0485    | 0.06023966<br>7974537   | 0.28392671<br>2975513  | 0.303297688<br>992009  | 0.44031845<br>4863807  | 0.26390975<br>7481258  | 1                     |



**Supplementary Table 4.** Primary Antibodies used for Immunohistochemistry and Flow Cytometry analysis.

| Antibody                 | Company          | Product Codes | IgG Species  | Conjugate       | Dilution |
|--------------------------|------------------|---------------|--------------|-----------------|----------|
| CFTR (24-1)              | R and D          | MAB25031      | Mouse        | none            | 1:200    |
| CFTR (13-1)              | R and D          | MAB1660       | Mouse        | none            | 1:200    |
| CK7                      | Abcam            | ab68459       | Rabbit       | none            | 1:200    |
| Acetylated alpha tubulin | Sigma-Aldrich    | T7451         | Mouse        | none            | 1:800    |
| ZO-1                     | Thermo Fisher    | 40-2200       | Rabbit       | none            | 1:400    |
| ARL13b                   | Proteintech      | 17711 1-AP    | Rabbit       | none            | 1:600    |
| human CK19               | Abcam            | ab52625       | Rabbit       | none            | 1:400    |
| human CK19               | DAKO             | M0888         | Mouse        | none            | 1:20     |
| mouse CK19               | Abcam            | 133496        | Rabbit       | none            | 1:400    |
| Mitochondria (113-1)     | Millipore        | MAB1273       | Mouse        | none            | 1:100    |
| AFP                      | DAKO             | A0008         | Mouse        | none            | 1:2000   |
| SOX9                     | Abcam            | ab76997       | Mouse        | none            | 1:400    |
| ASBT (C14)               | Santa Cruz       | sc27493       | Goat         | none            | 1:50     |
| SCTR                     | Sigma-Aldrich    | HPA007269     | Rabbit       | none            | 1:50     |
| SLC4A2                   | Sigma-Aldrich    | HPA019339     | Rabbit       | none            | 1:50     |
| TGR5                     | Invitrogen       | PA5-27076     | Rabbit       | none            | 1:100    |
| ALB                      | Bethyl           | A80-129A      | Goat         | none            | 1:200    |
| DHIC5-4D9                | gift from oregon |               | Mouse (IgM)  | none            | 1:20     |
| CD117 (c-KIT)            | BD pharmingen    | BD340529      | Mouse (IgG1) | PE              | 1:50     |
| CD184 (CXCR4)            | BD pharmingen    | BD555976      | Mouse (IgG1) | APC             | 1:50     |
| CD326 (EPCAM)            | eBioscience      | 12-9326-73    | Mouse (IgG1) | PE              | 1:200    |
| SSEA4                    | BD Horizon       | 561156        | Mouse (IgG3) | V450            | 1:100    |
| TRA-1-60                 | Biologend        | 330605        | Mouse (IgM)  | Alexa Fluor 647 | 1:100    |
| OCT3/4                   | BD pharmingen    | 560791        | Mouse (IgG1) | Alexa Fluor 488 | 1:100    |
| SOX2                     | BD pharmingen    | 561556        | Mouse (IgG1) | PE              | 1:100    |
| NANOG                    | BD pharmingen    | 561506        | Mouse (IgG1) | PerCP-Cy5.5     | 1:100    |

**Supplementary Table 5.** Secondary Antibodies used for Immunohistochemistry and Flow Cytometry analysis.

| Antibody                        | Company                | Product Codes | Dilution |
|---------------------------------|------------------------|---------------|----------|
| IgG Donkey anti-Mouse Alexa488  | Invitrogen             | A21202        | 1:400    |
| IgG Donkey anti-Rabbit Alexa555 | Invitrogen             | A31572        | 1:400    |
| IgG Donkey anti-Mouse Alexa555  | Invitrogen             | A31570        | 1:400    |
| IgG Donkey anti-Rabbit Alexa488 | Invitrogen             | A21206        | 1:400    |
| IgG Donkey anti-Goat Alexa488   | Invitrogen             | A11055        | 1:400    |
| IgG Donkey anti-Goat Alexa647   | Invitrogen             | A21447        | 1:400    |
| IgM Goat anti-Mouse APC         | Jackson ImmunoResearch | 115-136-075   | 1:200    |

**Supplementary Table 6.** Primers used for RT-PCR analysis.

| Gene       | Sequences (Forward)             | Sequences (Reverse)            |
|------------|---------------------------------|--------------------------------|
| CFTR       | 5'-AGGACTATGGACACTTCGTGCCTT-3'  | 5'-ATTTGGAACCAGCGCAGTGTGAC-3'  |
| CK7        | 5'-AAGGATGCTCGTGCCAAG-3'        | 5'-AGCTTCACGCTCATGAGTTC-3'     |
| SPP1       | 5'-CGAGGAGTTGAATGGTGCATA-3'     | 5'-TCCAGCTGACTCGTTTCATAAC-3'   |
| TRPV4      | 5'-AGGTGAACTGGTCTCACTGG-3'      | 5'-GCGAGAAGCCATAAATACTGGTAG-3' |
| PKD1       | 5'-GGACAAGGTGTGAGCCTGAG-3'      | 5'-AGCTGGTAGACGTCCTCTGT-3'     |
| PKD2       | 5'-TTCCCAGATCAGTCATGGTTAG-3'    | 5'-CCTCCATGCCTTCTGTAGATT-3'    |
| ALB        | 5'-GTGAAACACAAGCCCAAGCAACA-3'   | 5'-TCAGCCTTGCACTTCTCTACA-3'    |
| AFP        | 5'-ACAGAGGAACAACCTGAGGCTGTC-3'  | 5'-AGCAAAGCAGACTTCCTGTCCTG-3'  |
| TMEM16A    | 5'-AAGTACTCGACGCTCCCGCC-3'      | 5'-ATAAGGAGTTCAGCAGCGTGCCC-3'  |
| AQP1       | 5'-TCTTCCGTGCCCTCATGTA-3'       | 5'-CAAGCGAGTTCAGTCAG-3'        |
| SLC5A1     | 5'-TCAGGAGAGCCTATGACCTATT-3'    | 5'-GGTGTCCGTCATCTTCATCTT-3'    |
| SLC4A2/AE2 | 5'-GGCATCTGTGCCCTCTTT-3'        | 5'-TCCTGAATCTTGGGCTTGTC-3'     |
| ITPR3      | 5'-CGAGATGCTGCCCTTGA-3'         | 5'-CAGAGACGGGCAAACCTGA-3'      |
| P2YR       | 5'-GACTTCTTGTACGTGCTGACT-3'     | 5'-GCTGCCATAGAGGTTACAT-3'      |
| SOX9       | 5'-TGCATTTCCCTCCTGCCTTTGCTTG-3' | 5'-GGGCACTTATTGGCTGCTGAAACA-3' |
| SCTR       | 5'-TGCATCATGGCCAACTACTC-3'      | 5'-AATCCCTGGAGGTACTTCTTTC-3'   |
| TBP        | 5'-TGAGTTGCTCATACCGTCTGCTA-3'   | 5'-CCCTCAAACCAACTTGTCACAGC-3'  |

**Supplementary Table 7.** RNA control samples used for RT-PCR analysis.

| RNA                                     | Source                                                          | Sex                | Lot      | Company           | Product number |
|-----------------------------------------|-----------------------------------------------------------------|--------------------|----------|-------------------|----------------|
| human gall bladder                      | normal gall bladder from 34-years old                           | Female             | A509245  | BioChain          | R1234118-10    |
| human adult liver                       | normal livers pooled from 3 Asians<br>(22-64-years old)         | Male               | 1402003  | Clontech          | 636531         |
| human fetal liver (Fig1b)               | pooled from 63 spontaneously aborted fetus,<br>aged 22-40 weeks | Male and<br>Female | 7030173  | Clontech          | 636540         |
| human fetal liver<br>(Fig2d,3e,Supp11a) | fetal liver from 24-weeks gestation                             | Male               | 1394     | cell applications | 1F21-50        |
| human pancreas                          | normal pancreas from a 35-years old Caucasian                   | Male               | 1703157A | Clontech          | 636577         |

## Supplementary Tables 8. Authentication of new iPSC lines

WT01

| Test Description                               | Method                                                                        | Expected Result                                                                                                              | Result                                                                                                                                                     |                                                                                        |
|------------------------------------------------|-------------------------------------------------------------------------------|------------------------------------------------------------------------------------------------------------------------------|------------------------------------------------------------------------------------------------------------------------------------------------------------|----------------------------------------------------------------------------------------|
| Expression of pluripotency-associated proteins | Flow cytometry                                                                | ≥ 80% of population is positive for expression of surface markers (SSEA4, Tra-1-60), and intracellular markers (OCT4, SOX2). | <b>Antigen</b><br>SSEA4 <sup>+</sup> /Tra-1-60 <sup>+</sup><br>OCT4 <sup>+</sup> /SOX2 <sup>+</sup>                                                        | <b>% Expressing-cells</b><br>96.8%<br>99.5%<br>(Histograms shown in Figure 1A)         |
|                                                | Immunofluorescence                                                            | Positive fluorescence of surface markers (SSEA4, TRA-1-60) and intracellular markers (OCT4, NANOG)                           | Positive fluorescence signals obtained using all antibodies (Representative images in Figure 1B)                                                           |                                                                                        |
| Gene expression of pluripotency markers        | qRT-PCR                                                                       | ≥ 80% expression measured in hESC reference standard (HES2 hESCs on Matrigel).                                               | <b>Gene</b><br>OCT4<br>NANOG<br>DNMT3B                                                                                                                     | <b>Relative Expression</b><br>102%<br>94%<br>88%                                       |
| Germ layer differentiation                     | Directed differentiation followed by qRT-PCR analysis                         | Increased expression of germ lineage-specific marker relative to starting pluripotent cell population                        | <b>Germ Layer</b><br>Endoderm<br>Mesoderm<br>Ectoderm                                                                                                      | <b>Gene</b><br>SOX17<br>HAND1<br>SOX1<br><b>Fold Induction</b><br>832<br>12,708<br>666 |
| Mycoplasma                                     | Lonza MycoAlert Plus kit                                                      | None detected                                                                                                                | None detected                                                                                                                                              |                                                                                        |
| Identity                                       | STR: PCR profiling of 9 STR regions plus Amelogenin for gender determination. | Consistent with expected <sup>1</sup>                                                                                        | Consistent with parental - Amel: XX<br>CSF1PO:10,12 D21S11:28,30 TH01:6,7<br>D13S317:12,12 D5S818:11,13 TPOX: 8,11<br>D16S539:11,12 D7S820:10,12 vWA:17,19 |                                                                                        |
| Karyotype                                      | G-banding analysis detecting structural abnormality of size >3-10Mb           | Normal karyotype, 46 XX or 46 XY 19/20 cells normal <sup>2</sup>                                                             | Normal karyotype, 46 XX at passage 5                                                                                                                       |                                                                                        |
| Post-Thaw Viability                            | Cell count and viability using Nucleocounter                                  | Viable cell count and viability 6 days post thaw                                                                             | Viable cell count<br>Viability                                                                                                                             | 1.23 E+06<br>90%                                                                       |
| Residual Sendai                                | RT-PCR against Sendai viral elements                                          | None detected in PCR amplification                                                                                           | None detected                                                                                                                                              |                                                                                        |

CF01a

| Test Description                                         | Method                                                                        | Expected Result                                                                                                       | Result                                                                                                                                                        |                                                                                                 |
|----------------------------------------------------------|-------------------------------------------------------------------------------|-----------------------------------------------------------------------------------------------------------------------|---------------------------------------------------------------------------------------------------------------------------------------------------------------|-------------------------------------------------------------------------------------------------|
| Expression of pluripotency-associated proteins           | Flow cytometry                                                                | ≥ 80% of population is positive for expression of surface markers (SSEA4, Tra-1-60), and intracellular marker (OCT4). | <b>Antigen</b><br>SSEA4<br>Tra-1-60<br>OCT4<br>SOX2                                                                                                           | <b>% Expressing-cells</b><br>99.6%<br>99.7%<br>99.3%<br>99.7%<br>(Histograms shown in Figure 1) |
|                                                          | qRT-PCR                                                                       | ≥ 80% expression measured in hESC reference standard (HES2 hESCs on Matrigel).                                        | <b>Gene</b><br>OCT4<br>NANOG<br>DNMT3B                                                                                                                        | <b>Relative Expression</b><br>96%<br>99%<br>89%                                                 |
| Germ layer differentiation                               | Directed Differentiation Followed by qPCR                                     | Increased expression of germ lineage-specific marker relative to starting pluripotent cell population                 | <b>Germ Layer</b><br>Endoderm<br>Mesoderm<br>Ectoderm                                                                                                         | <b>Gene</b><br>SOX17<br>HAND1<br>SOX1<br><b>Fold Induction</b><br>9,500<br>68,000<br>362        |
| Definitive endoderm differentiation – gene expression    | Directed Differentiation Followed by qPCR                                     | Increased expression of additional endoderm lineage-specific marker relative to starting pluripotent cell population  | <b>Gene</b><br>GATA 6<br>GATA 4<br>FOXA2                                                                                                                      | <b>Fold Induction</b><br>9,400<br>2,200<br>1,300                                                |
| Definitive endoderm differentiation – protein expression | Directed Differentiation Followed by Flow cytometry                           | ≥ 80% of population is double positive for expression of DE markers (cKIT and CXCR4)                                  | <b>% Expressing-cells</b><br>97.5%<br>(Histograms shown in Figure 2)                                                                                          |                                                                                                 |
| Mycoplasma                                               | Lonza MycoAlert Plus kit                                                      | None detected                                                                                                         | None detected                                                                                                                                                 |                                                                                                 |
| Identity                                                 | STR: PCR profiling of 9 STR regions plus Amelogenin for gender determination. | Consistent with expected <sup>1</sup>                                                                                 | Consistent with parental - Amel: XY<br>CSF1PO:12,12 D21S11:29,29 TH01:9.3,9.3<br>D13S317:11,12 D5S818:11,12 TPOX: 11,11<br>D16S539:11,12 D7S820:7,8 vWA:17,18 |                                                                                                 |
| Karyotype                                                | G-banding analysis detecting structural abnormality of size >3-10Mb           | Normal karyotype, 46 XX or 46 XY 19/20 cells normal <sup>2</sup>                                                      | Normal karyotype, 46 XY at passage 3+5                                                                                                                        |                                                                                                 |
| Post-Thaw Viability                                      | Cell count and viability using Nucleocounter                                  | Viable cell count and viability within 7 days post thaw                                                               | Viable cell count<br>Viability                                                                                                                                | 2.89E+05<br>83.50%                                                                              |
| Residual Sendai                                          | RT-PCR against Sendai viral elements                                          | None detected in PCR amplification                                                                                    | None detected                                                                                                                                                 |                                                                                                 |

## Supplementary Tables 8. Authentication of new iPSC lines

### CF01b

| Test Description                                         | Method                                                                        | Expected Result                                                                                                       | Result                                                                                                                                                                                                                                                                                                |                           |                            |                       |          |          |       |          |       |        |          |      |     |
|----------------------------------------------------------|-------------------------------------------------------------------------------|-----------------------------------------------------------------------------------------------------------------------|-------------------------------------------------------------------------------------------------------------------------------------------------------------------------------------------------------------------------------------------------------------------------------------------------------|---------------------------|----------------------------|-----------------------|----------|----------|-------|----------|-------|--------|----------|------|-----|
| Expression of pluripotency-associated proteins           | Flow cytometry                                                                | ≥ 80% of population is positive for expression of surface markers (SSEA4, Tra-1-60), and intracellular marker (OCT4). | <table border="0"> <tr> <td><b>Antigen</b></td> <td><b>% Expressing-cells</b></td> </tr> <tr> <td>SSEA4</td> <td>98.8%</td> </tr> <tr> <td>Tra-1-60</td> <td>99.2%</td> </tr> <tr> <td>OCT4</td> <td>98.8%</td> </tr> <tr> <td>SOX2</td> <td>99.3%</td> </tr> </table> (Histograms shown in Figure 1) | <b>Antigen</b>            | <b>% Expressing-cells</b>  | SSEA4                 | 98.8%    | Tra-1-60 | 99.2% | OCT4     | 98.8% | SOX2   | 99.3%    |      |     |
| <b>Antigen</b>                                           | <b>% Expressing-cells</b>                                                     |                                                                                                                       |                                                                                                                                                                                                                                                                                                       |                           |                            |                       |          |          |       |          |       |        |          |      |     |
| SSEA4                                                    | 98.8%                                                                         |                                                                                                                       |                                                                                                                                                                                                                                                                                                       |                           |                            |                       |          |          |       |          |       |        |          |      |     |
| Tra-1-60                                                 | 99.2%                                                                         |                                                                                                                       |                                                                                                                                                                                                                                                                                                       |                           |                            |                       |          |          |       |          |       |        |          |      |     |
| OCT4                                                     | 98.8%                                                                         |                                                                                                                       |                                                                                                                                                                                                                                                                                                       |                           |                            |                       |          |          |       |          |       |        |          |      |     |
| SOX2                                                     | 99.3%                                                                         |                                                                                                                       |                                                                                                                                                                                                                                                                                                       |                           |                            |                       |          |          |       |          |       |        |          |      |     |
| Gene expression of pluripotency markers                  | qRT-PCR                                                                       | ≥ 80% expression measured in hESC reference standard (HES2 hESCs on Matrigel).                                        | <table border="0"> <tr> <td><b>Gene</b></td> <td><b>Relative Expression</b></td> </tr> <tr> <td>OCT4</td> <td>146%</td> </tr> <tr> <td>NANOG</td> <td>96%</td> </tr> <tr> <td>DNMT3B</td> <td>114%</td> </tr> </table>                                                                                | <b>Gene</b>               | <b>Relative Expression</b> | OCT4                  | 146%     | NANOG    | 96%   | DNMT3B   | 114%  |        |          |      |     |
| <b>Gene</b>                                              | <b>Relative Expression</b>                                                    |                                                                                                                       |                                                                                                                                                                                                                                                                                                       |                           |                            |                       |          |          |       |          |       |        |          |      |     |
| OCT4                                                     | 146%                                                                          |                                                                                                                       |                                                                                                                                                                                                                                                                                                       |                           |                            |                       |          |          |       |          |       |        |          |      |     |
| NANOG                                                    | 96%                                                                           |                                                                                                                       |                                                                                                                                                                                                                                                                                                       |                           |                            |                       |          |          |       |          |       |        |          |      |     |
| DNMT3B                                                   | 114%                                                                          |                                                                                                                       |                                                                                                                                                                                                                                                                                                       |                           |                            |                       |          |          |       |          |       |        |          |      |     |
| Germ layer differentiation                               | Directed Differentiation Followed by qPCR                                     | Increased expression of germ lineage-specific marker relative to starting pluripotent cell population                 | <table border="0"> <tr> <td><b>Germ Layer</b></td> <td><b>Gene</b></td> <td><b>Fold Induction</b></td> </tr> <tr> <td>Endoderm</td> <td>SOX17</td> <td>3,300</td> </tr> <tr> <td>Mesoderm</td> <td>HAND1</td> <td>16,400</td> </tr> <tr> <td>Ectoderm</td> <td>SOX1</td> <td>181</td> </tr> </table>  | <b>Germ Layer</b>         | <b>Gene</b>                | <b>Fold Induction</b> | Endoderm | SOX17    | 3,300 | Mesoderm | HAND1 | 16,400 | Ectoderm | SOX1 | 181 |
| <b>Germ Layer</b>                                        | <b>Gene</b>                                                                   | <b>Fold Induction</b>                                                                                                 |                                                                                                                                                                                                                                                                                                       |                           |                            |                       |          |          |       |          |       |        |          |      |     |
| Endoderm                                                 | SOX17                                                                         | 3,300                                                                                                                 |                                                                                                                                                                                                                                                                                                       |                           |                            |                       |          |          |       |          |       |        |          |      |     |
| Mesoderm                                                 | HAND1                                                                         | 16,400                                                                                                                |                                                                                                                                                                                                                                                                                                       |                           |                            |                       |          |          |       |          |       |        |          |      |     |
| Ectoderm                                                 | SOX1                                                                          | 181                                                                                                                   |                                                                                                                                                                                                                                                                                                       |                           |                            |                       |          |          |       |          |       |        |          |      |     |
| Definitive endoderm differentiation – gene expression    | Directed Differentiation Followed by qPCR                                     | Increased expression of additional endoderm lineage-specific marker relative to starting pluripotent cell population  | <table border="0"> <tr> <td><b>Gene</b></td> <td><b>Fold Induction</b></td> </tr> <tr> <td>GATA 6</td> <td>4,500</td> </tr> <tr> <td>GATA 4</td> <td>870</td> </tr> <tr> <td>FOXA2</td> <td>310</td> </tr> </table>                                                                                   | <b>Gene</b>               | <b>Fold Induction</b>      | GATA 6                | 4,500    | GATA 4   | 870   | FOXA2    | 310   |        |          |      |     |
| <b>Gene</b>                                              | <b>Fold Induction</b>                                                         |                                                                                                                       |                                                                                                                                                                                                                                                                                                       |                           |                            |                       |          |          |       |          |       |        |          |      |     |
| GATA 6                                                   | 4,500                                                                         |                                                                                                                       |                                                                                                                                                                                                                                                                                                       |                           |                            |                       |          |          |       |          |       |        |          |      |     |
| GATA 4                                                   | 870                                                                           |                                                                                                                       |                                                                                                                                                                                                                                                                                                       |                           |                            |                       |          |          |       |          |       |        |          |      |     |
| FOXA2                                                    | 310                                                                           |                                                                                                                       |                                                                                                                                                                                                                                                                                                       |                           |                            |                       |          |          |       |          |       |        |          |      |     |
| Definitive endoderm differentiation – protein expression | Directed Differentiation Followed by Flow cytometry                           | ≥ 80% of population is double positive for expression of DE markers (cKIT and CXCR4)                                  | <table border="0"> <tr> <td><b>% Expressing-cells</b></td> </tr> <tr> <td>95.7%</td> </tr> </table> (Histogram shown in Figure 1)                                                                                                                                                                     | <b>% Expressing-cells</b> | 95.7%                      |                       |          |          |       |          |       |        |          |      |     |
| <b>% Expressing-cells</b>                                |                                                                               |                                                                                                                       |                                                                                                                                                                                                                                                                                                       |                           |                            |                       |          |          |       |          |       |        |          |      |     |
| 95.7%                                                    |                                                                               |                                                                                                                       |                                                                                                                                                                                                                                                                                                       |                           |                            |                       |          |          |       |          |       |        |          |      |     |
| Mycoplasma                                               | Lonza MycoAlert Plus kit                                                      | None detected                                                                                                         | None detected                                                                                                                                                                                                                                                                                         |                           |                            |                       |          |          |       |          |       |        |          |      |     |
| Identity                                                 | STR: PCR profiling of 9 STR regions plus Amelogenin for gender determination. | Consistent with expected <sup>1</sup>                                                                                 | Consistent with parental - Amel: XY<br>CSF1PO:12,12 D21S11:29,29 TH01:9.3,9.3<br>D13S317:11,12 D5S818:11,12 TPOX: 11,11<br>D16S539:11,12 D7S820:7,8 vWA:17,18                                                                                                                                         |                           |                            |                       |          |          |       |          |       |        |          |      |     |
| Karyotype                                                | G-banding analysis detecting structural abnormality of size >3-10Mb           | Normal karyotype, 46 XX or 46 XY 19/20 cells normal <sup>2</sup>                                                      | Normal karyotype, 46 XY at passage 3+5                                                                                                                                                                                                                                                                |                           |                            |                       |          |          |       |          |       |        |          |      |     |
| Post-Thaw Viability                                      | Cell count and viability using Nucleocounter                                  | Viable cell count and viability within 7 days post thaw                                                               | <table border="0"> <tr> <td>Viable cell count</td> <td>2.45E+06</td> </tr> <tr> <td>Viability</td> <td>93%</td> </tr> </table>                                                                                                                                                                        | Viable cell count         | 2.45E+06                   | Viability             | 93%      |          |       |          |       |        |          |      |     |
| Viable cell count                                        | 2.45E+06                                                                      |                                                                                                                       |                                                                                                                                                                                                                                                                                                       |                           |                            |                       |          |          |       |          |       |        |          |      |     |
| Viability                                                | 93%                                                                           |                                                                                                                       |                                                                                                                                                                                                                                                                                                       |                           |                            |                       |          |          |       |          |       |        |          |      |     |
| Residual Sendai                                          | RT-PCR against Sendai viral elements                                          | None detected in PCR amplification                                                                                    | None detected                                                                                                                                                                                                                                                                                         |                           |                            |                       |          |          |       |          |       |        |          |      |     |

### CF01MC

| Test Description                               | Method                                                                                 | Expected Result                                                                                                       | Result                                                                                                                                                                                                                                                                                                |                   |                            |           |       |          |       |        |       |      |       |
|------------------------------------------------|----------------------------------------------------------------------------------------|-----------------------------------------------------------------------------------------------------------------------|-------------------------------------------------------------------------------------------------------------------------------------------------------------------------------------------------------------------------------------------------------------------------------------------------------|-------------------|----------------------------|-----------|-------|----------|-------|--------|-------|------|-------|
| Expression of pluripotency-associated proteins | Flow cytometry                                                                         | ≥ 80% of population is positive for expression of surface markers (SSEA4, Tra-1-60), and intracellular marker (OCT4). | <table border="0"> <tr> <td><b>Antigen</b></td> <td><b>% Expressing-cells</b></td> </tr> <tr> <td>SSEA4</td> <td>99.5%</td> </tr> <tr> <td>Tra-1-60</td> <td>96.3%</td> </tr> <tr> <td>OCT4</td> <td>99.9%</td> </tr> <tr> <td>SOX2</td> <td>99.8%</td> </tr> </table> (Histograms shown in Figure 1) | <b>Antigen</b>    | <b>% Expressing-cells</b>  | SSEA4     | 99.5% | Tra-1-60 | 96.3% | OCT4   | 99.9% | SOX2 | 99.8% |
| <b>Antigen</b>                                 | <b>% Expressing-cells</b>                                                              |                                                                                                                       |                                                                                                                                                                                                                                                                                                       |                   |                            |           |       |          |       |        |       |      |       |
| SSEA4                                          | 99.5%                                                                                  |                                                                                                                       |                                                                                                                                                                                                                                                                                                       |                   |                            |           |       |          |       |        |       |      |       |
| Tra-1-60                                       | 96.3%                                                                                  |                                                                                                                       |                                                                                                                                                                                                                                                                                                       |                   |                            |           |       |          |       |        |       |      |       |
| OCT4                                           | 99.9%                                                                                  |                                                                                                                       |                                                                                                                                                                                                                                                                                                       |                   |                            |           |       |          |       |        |       |      |       |
| SOX2                                           | 99.8%                                                                                  |                                                                                                                       |                                                                                                                                                                                                                                                                                                       |                   |                            |           |       |          |       |        |       |      |       |
| Gene expression of pluripotency markers        | qRT-PCR                                                                                | ≥ 80% expression measured in hESC reference standard (HES2 hESCs on Matrigel).                                        | <table border="0"> <tr> <td><b>Gene</b></td> <td><b>Relative Expression</b></td> </tr> <tr> <td>OCT4</td> <td>100%</td> </tr> <tr> <td>NANOG</td> <td>125%</td> </tr> <tr> <td>DNMT3B</td> <td>228%</td> </tr> </table>                                                                               | <b>Gene</b>       | <b>Relative Expression</b> | OCT4      | 100%  | NANOG    | 125%  | DNMT3B | 228%  |      |       |
| <b>Gene</b>                                    | <b>Relative Expression</b>                                                             |                                                                                                                       |                                                                                                                                                                                                                                                                                                       |                   |                            |           |       |          |       |        |       |      |       |
| OCT4                                           | 100%                                                                                   |                                                                                                                       |                                                                                                                                                                                                                                                                                                       |                   |                            |           |       |          |       |        |       |      |       |
| NANOG                                          | 125%                                                                                   |                                                                                                                       |                                                                                                                                                                                                                                                                                                       |                   |                            |           |       |          |       |        |       |      |       |
| DNMT3B                                         | 228%                                                                                   |                                                                                                                       |                                                                                                                                                                                                                                                                                                       |                   |                            |           |       |          |       |        |       |      |       |
| Mycoplasma                                     | Lonza MycoAlert Plus kit                                                               | None detected                                                                                                         | None detected                                                                                                                                                                                                                                                                                         |                   |                            |           |       |          |       |        |       |      |       |
| Identity                                       | STR: PCR profiling of 9 STR regions plus Amelogenin for gender determination.          | Consistent with expected <sup>1</sup>                                                                                 | Consistent with parental - Amel: XY<br>CSF1PO: 12,12 D21S11:29,29 TH01:9.3,9.3<br>D13S317:11,12 D5S818:11,12 TPOX: 11,11<br>D16S539:11,12 D7S820:7,8 vWA:17,18                                                                                                                                        |                   |                            |           |       |          |       |        |       |      |       |
| Karyotype                                      | G-banding analysis detecting structural abnormality of size >3-10Mb                    | Normal karyotype, 46 XX or 46 XY 19/20 cells normal <sup>2</sup>                                                      | Normal karyotype, 46 XY at passage P3+23                                                                                                                                                                                                                                                              |                   |                            |           |       |          |       |        |       |      |       |
| Post-Thaw Viability                            | Cell count and viability using Nucleocounter                                           | Viable cell count and viability within 7 days post thaw                                                               | <table border="0"> <tr> <td>Viable cell count</td> <td>5.20E6</td> </tr> <tr> <td>Viability</td> <td>80.1%</td> </tr> </table>                                                                                                                                                                        | Viable cell count | 5.20E6                     | Viability | 80.1% |          |       |        |       |      |       |
| Viable cell count                              | 5.20E6                                                                                 |                                                                                                                       |                                                                                                                                                                                                                                                                                                       |                   |                            |           |       |          |       |        |       |      |       |
| Viability                                      | 80.1%                                                                                  |                                                                                                                       |                                                                                                                                                                                                                                                                                                       |                   |                            |           |       |          |       |        |       |      |       |
| Sequence confirmation                          | PCR and Sanger sequencing of targeted locus                                            | Desired mutation                                                                                                      | Full sequence of wild-type and targeted allele show no aberrant mutations (Figure 2)                                                                                                                                                                                                                  |                   |                            |           |       |          |       |        |       |      |       |
| Off-target analysis                            | PCR and Sanger sequencing of genomic sites likely to be subject to off-target cleavage | No mutations in putative off-target cut sites                                                                         | Sequenced 5 genomic sites most likely to be inappropriately cut by designed gRNA and found no aberrant mutations (Table 1)                                                                                                                                                                            |                   |                            |           |       |          |       |        |       |      |       |
| Clonal Population                              | TOPO cloning of PCR from genomic DNA and sequencing                                    | Homozygous– 100% of individual TOPO reactions represent each allele                                                   | 12 TOPO clones sequenced – all corrected                                                                                                                                                                                                                                                              |                   |                            |           |       |          |       |        |       |      |       |

## Supplementary Tables 8. Authentication of new iPSC lines

### CF02a

| Test Description                                         | Method                                                                        | Expected Result                                                                                                       | Result                                                                                                                                                                                                                                                                                                |                           |                            |                       |          |          |       |          |       |        |          |      |     |
|----------------------------------------------------------|-------------------------------------------------------------------------------|-----------------------------------------------------------------------------------------------------------------------|-------------------------------------------------------------------------------------------------------------------------------------------------------------------------------------------------------------------------------------------------------------------------------------------------------|---------------------------|----------------------------|-----------------------|----------|----------|-------|----------|-------|--------|----------|------|-----|
| Expression of pluripotency-associated proteins           | Flow cytometry                                                                | ≥ 80% of population is positive for expression of surface markers (SSEA4, Tra-1-60), and intracellular marker (OCT4). | <table border="0"> <tr> <td><b>Antigen</b></td> <td><b>% Expressing-cells</b></td> </tr> <tr> <td>SSEA4</td> <td>98.4%</td> </tr> <tr> <td>Tra-1-60</td> <td>99.7%</td> </tr> <tr> <td>OCT4</td> <td>99.0%</td> </tr> <tr> <td>SOX2</td> <td>99.6%</td> </tr> </table> (Histograms shown in Figure 1) | <b>Antigen</b>            | <b>% Expressing-cells</b>  | SSEA4                 | 98.4%    | Tra-1-60 | 99.7% | OCT4     | 99.0% | SOX2   | 99.6%    |      |     |
| <b>Antigen</b>                                           | <b>% Expressing-cells</b>                                                     |                                                                                                                       |                                                                                                                                                                                                                                                                                                       |                           |                            |                       |          |          |       |          |       |        |          |      |     |
| SSEA4                                                    | 98.4%                                                                         |                                                                                                                       |                                                                                                                                                                                                                                                                                                       |                           |                            |                       |          |          |       |          |       |        |          |      |     |
| Tra-1-60                                                 | 99.7%                                                                         |                                                                                                                       |                                                                                                                                                                                                                                                                                                       |                           |                            |                       |          |          |       |          |       |        |          |      |     |
| OCT4                                                     | 99.0%                                                                         |                                                                                                                       |                                                                                                                                                                                                                                                                                                       |                           |                            |                       |          |          |       |          |       |        |          |      |     |
| SOX2                                                     | 99.6%                                                                         |                                                                                                                       |                                                                                                                                                                                                                                                                                                       |                           |                            |                       |          |          |       |          |       |        |          |      |     |
| Gene expression of pluripotency markers                  | qRT-PCR                                                                       | ≥ 80% expression measured in hESC reference standard (HES2 hESCs on Matrigel).                                        | <table border="0"> <tr> <td><b>Gene</b></td> <td><b>Relative Expression</b></td> </tr> <tr> <td>OCT4</td> <td>100%</td> </tr> <tr> <td>NANOG</td> <td>106%</td> </tr> <tr> <td>DNMT3B</td> <td>85%</td> </tr> </table>                                                                                | <b>Gene</b>               | <b>Relative Expression</b> | OCT4                  | 100%     | NANOG    | 106%  | DNMT3B   | 85%   |        |          |      |     |
| <b>Gene</b>                                              | <b>Relative Expression</b>                                                    |                                                                                                                       |                                                                                                                                                                                                                                                                                                       |                           |                            |                       |          |          |       |          |       |        |          |      |     |
| OCT4                                                     | 100%                                                                          |                                                                                                                       |                                                                                                                                                                                                                                                                                                       |                           |                            |                       |          |          |       |          |       |        |          |      |     |
| NANOG                                                    | 106%                                                                          |                                                                                                                       |                                                                                                                                                                                                                                                                                                       |                           |                            |                       |          |          |       |          |       |        |          |      |     |
| DNMT3B                                                   | 85%                                                                           |                                                                                                                       |                                                                                                                                                                                                                                                                                                       |                           |                            |                       |          |          |       |          |       |        |          |      |     |
| Germ layer differentiation                               | Directed Differentiation Followed by qPCR                                     | Increased expression of germ lineage-specific marker relative to starting pluripotent cell population                 | <table border="0"> <tr> <td><b>Germ Layer</b></td> <td><b>Gene</b></td> <td><b>Fold Induction</b></td> </tr> <tr> <td>Endoderm</td> <td>SOX17</td> <td>6,200</td> </tr> <tr> <td>Mesoderm</td> <td>HAND1</td> <td>38,700</td> </tr> <tr> <td>Ectoderm</td> <td>SOX1</td> <td>106</td> </tr> </table>  | <b>Germ Layer</b>         | <b>Gene</b>                | <b>Fold Induction</b> | Endoderm | SOX17    | 6,200 | Mesoderm | HAND1 | 38,700 | Ectoderm | SOX1 | 106 |
| <b>Germ Layer</b>                                        | <b>Gene</b>                                                                   | <b>Fold Induction</b>                                                                                                 |                                                                                                                                                                                                                                                                                                       |                           |                            |                       |          |          |       |          |       |        |          |      |     |
| Endoderm                                                 | SOX17                                                                         | 6,200                                                                                                                 |                                                                                                                                                                                                                                                                                                       |                           |                            |                       |          |          |       |          |       |        |          |      |     |
| Mesoderm                                                 | HAND1                                                                         | 38,700                                                                                                                |                                                                                                                                                                                                                                                                                                       |                           |                            |                       |          |          |       |          |       |        |          |      |     |
| Ectoderm                                                 | SOX1                                                                          | 106                                                                                                                   |                                                                                                                                                                                                                                                                                                       |                           |                            |                       |          |          |       |          |       |        |          |      |     |
| Definitive endoderm differentiation – gene expression    | Directed Differentiation Followed by qPCR                                     | Increased expression of additional endoderm lineage-specific marker relative to starting pluripotent cell population  | <table border="0"> <tr> <td><b>Gene</b></td> <td><b>Fold Induction</b></td> </tr> <tr> <td>GATA 6</td> <td>7000</td> </tr> <tr> <td>GATA 4</td> <td>5,900</td> </tr> <tr> <td>FOXA2</td> <td>680</td> </tr> </table>                                                                                  | <b>Gene</b>               | <b>Fold Induction</b>      | GATA 6                | 7000     | GATA 4   | 5,900 | FOXA2    | 680   |        |          |      |     |
| <b>Gene</b>                                              | <b>Fold Induction</b>                                                         |                                                                                                                       |                                                                                                                                                                                                                                                                                                       |                           |                            |                       |          |          |       |          |       |        |          |      |     |
| GATA 6                                                   | 7000                                                                          |                                                                                                                       |                                                                                                                                                                                                                                                                                                       |                           |                            |                       |          |          |       |          |       |        |          |      |     |
| GATA 4                                                   | 5,900                                                                         |                                                                                                                       |                                                                                                                                                                                                                                                                                                       |                           |                            |                       |          |          |       |          |       |        |          |      |     |
| FOXA2                                                    | 680                                                                           |                                                                                                                       |                                                                                                                                                                                                                                                                                                       |                           |                            |                       |          |          |       |          |       |        |          |      |     |
| Definitive endoderm differentiation – protein expression | Directed Differentiation Followed by Flow cytometry                           | ≥ 80% of population is double positive for expression of DE markers (cKIT and CXCR4)                                  | <table border="0"> <tr> <td><b>% Expressing-cells</b></td> </tr> <tr> <td>99.9%</td> </tr> </table> (Histogram shown in Figure 1)                                                                                                                                                                     | <b>% Expressing-cells</b> | 99.9%                      |                       |          |          |       |          |       |        |          |      |     |
| <b>% Expressing-cells</b>                                |                                                                               |                                                                                                                       |                                                                                                                                                                                                                                                                                                       |                           |                            |                       |          |          |       |          |       |        |          |      |     |
| 99.9%                                                    |                                                                               |                                                                                                                       |                                                                                                                                                                                                                                                                                                       |                           |                            |                       |          |          |       |          |       |        |          |      |     |
| Mycoplasma                                               | Lonza MycoAlert Plus kit                                                      | None detected                                                                                                         | None detected                                                                                                                                                                                                                                                                                         |                           |                            |                       |          |          |       |          |       |        |          |      |     |
| Identity                                                 | STR: PCR profiling of 9 STR regions plus Amelogenin for gender determination. | Consistent with expected <sup>1</sup>                                                                                 | Consistent with parental - Amel: XX<br>CSF1PO:10,12 D21S11:27,30 TH01:6,8<br>D13S317:8,14 D5S818:11,13 TPOX: 8,11<br>D16S539:8,13 D7S820:11,12 vWA:16,19                                                                                                                                              |                           |                            |                       |          |          |       |          |       |        |          |      |     |
| Karyotype                                                | G-banding analysis detecting structural abnormality of size >3-10Mb           | Normal karyotype, 46 XX or 46 XY<br>19/20 cells normal <sup>2</sup>                                                   | Normal karyotype, 46 XX at passage 3+5                                                                                                                                                                                                                                                                |                           |                            |                       |          |          |       |          |       |        |          |      |     |
| Post-Thaw Viability                                      | Cell count and viability using Nucleocounter                                  | Viable cell count and viability within 7 days post thaw                                                               | <table border="0"> <tr> <td>Viable cell count</td> <td>4.05E+06</td> </tr> <tr> <td>Viability</td> <td>90.3%</td> </tr> </table>                                                                                                                                                                      | Viable cell count         | 4.05E+06                   | Viability             | 90.3%    |          |       |          |       |        |          |      |     |
| Viable cell count                                        | 4.05E+06                                                                      |                                                                                                                       |                                                                                                                                                                                                                                                                                                       |                           |                            |                       |          |          |       |          |       |        |          |      |     |
| Viability                                                | 90.3%                                                                         |                                                                                                                       |                                                                                                                                                                                                                                                                                                       |                           |                            |                       |          |          |       |          |       |        |          |      |     |
| Residual Sendai                                          | RT-PCR against Sendai viral elements                                          | None detected in PCR amplification                                                                                    | None detected                                                                                                                                                                                                                                                                                         |                           |                            |                       |          |          |       |          |       |        |          |      |     |

### CF02b

| Test Description                                         | Method                                                                        | Expected Result                                                                                                       | Result                                                                                                                                                                                                                                                                                                |                           |                            |                       |          |          |       |          |       |        |          |      |     |
|----------------------------------------------------------|-------------------------------------------------------------------------------|-----------------------------------------------------------------------------------------------------------------------|-------------------------------------------------------------------------------------------------------------------------------------------------------------------------------------------------------------------------------------------------------------------------------------------------------|---------------------------|----------------------------|-----------------------|----------|----------|-------|----------|-------|--------|----------|------|-----|
| Expression of pluripotency-associated proteins           | Flow cytometry                                                                | ≥ 80% of population is positive for expression of surface markers (SSEA4, Tra-1-60), and intracellular marker (OCT4). | <table border="0"> <tr> <td><b>Antigen</b></td> <td><b>% Expressing-cells</b></td> </tr> <tr> <td>SSEA4</td> <td>99.6%</td> </tr> <tr> <td>Tra-1-60</td> <td>99.7%</td> </tr> <tr> <td>OCT4</td> <td>99.3%</td> </tr> <tr> <td>SOX2</td> <td>99.7%</td> </tr> </table> (Histograms shown in Figure 1) | <b>Antigen</b>            | <b>% Expressing-cells</b>  | SSEA4                 | 99.6%    | Tra-1-60 | 99.7% | OCT4     | 99.3% | SOX2   | 99.7%    |      |     |
| <b>Antigen</b>                                           | <b>% Expressing-cells</b>                                                     |                                                                                                                       |                                                                                                                                                                                                                                                                                                       |                           |                            |                       |          |          |       |          |       |        |          |      |     |
| SSEA4                                                    | 99.6%                                                                         |                                                                                                                       |                                                                                                                                                                                                                                                                                                       |                           |                            |                       |          |          |       |          |       |        |          |      |     |
| Tra-1-60                                                 | 99.7%                                                                         |                                                                                                                       |                                                                                                                                                                                                                                                                                                       |                           |                            |                       |          |          |       |          |       |        |          |      |     |
| OCT4                                                     | 99.3%                                                                         |                                                                                                                       |                                                                                                                                                                                                                                                                                                       |                           |                            |                       |          |          |       |          |       |        |          |      |     |
| SOX2                                                     | 99.7%                                                                         |                                                                                                                       |                                                                                                                                                                                                                                                                                                       |                           |                            |                       |          |          |       |          |       |        |          |      |     |
| Gene expression of pluripotency markers                  | qRT-PCR                                                                       | ≥ 80% expression measured in hESC reference standard (HES2 hESCs on Matrigel).                                        | <table border="0"> <tr> <td><b>Gene</b></td> <td><b>Relative Expression</b></td> </tr> <tr> <td>OCT4</td> <td>153%</td> </tr> <tr> <td>NANOG</td> <td>151%</td> </tr> <tr> <td>DNMT3B</td> <td>201%</td> </tr> </table>                                                                               | <b>Gene</b>               | <b>Relative Expression</b> | OCT4                  | 153%     | NANOG    | 151%  | DNMT3B   | 201%  |        |          |      |     |
| <b>Gene</b>                                              | <b>Relative Expression</b>                                                    |                                                                                                                       |                                                                                                                                                                                                                                                                                                       |                           |                            |                       |          |          |       |          |       |        |          |      |     |
| OCT4                                                     | 153%                                                                          |                                                                                                                       |                                                                                                                                                                                                                                                                                                       |                           |                            |                       |          |          |       |          |       |        |          |      |     |
| NANOG                                                    | 151%                                                                          |                                                                                                                       |                                                                                                                                                                                                                                                                                                       |                           |                            |                       |          |          |       |          |       |        |          |      |     |
| DNMT3B                                                   | 201%                                                                          |                                                                                                                       |                                                                                                                                                                                                                                                                                                       |                           |                            |                       |          |          |       |          |       |        |          |      |     |
| Germ layer differentiation                               | Directed Differentiation Followed by qPCR                                     | Increased expression of germ lineage-specific marker relative to starting pluripotent cell population                 | <table border="0"> <tr> <td><b>Germ Layer</b></td> <td><b>Gene</b></td> <td><b>Fold Induction</b></td> </tr> <tr> <td>Endoderm</td> <td>SOX17</td> <td>4,000</td> </tr> <tr> <td>Mesoderm</td> <td>HAND1</td> <td>11,300</td> </tr> <tr> <td>Ectoderm</td> <td>SOX1</td> <td>200</td> </tr> </table>  | <b>Germ Layer</b>         | <b>Gene</b>                | <b>Fold Induction</b> | Endoderm | SOX17    | 4,000 | Mesoderm | HAND1 | 11,300 | Ectoderm | SOX1 | 200 |
| <b>Germ Layer</b>                                        | <b>Gene</b>                                                                   | <b>Fold Induction</b>                                                                                                 |                                                                                                                                                                                                                                                                                                       |                           |                            |                       |          |          |       |          |       |        |          |      |     |
| Endoderm                                                 | SOX17                                                                         | 4,000                                                                                                                 |                                                                                                                                                                                                                                                                                                       |                           |                            |                       |          |          |       |          |       |        |          |      |     |
| Mesoderm                                                 | HAND1                                                                         | 11,300                                                                                                                |                                                                                                                                                                                                                                                                                                       |                           |                            |                       |          |          |       |          |       |        |          |      |     |
| Ectoderm                                                 | SOX1                                                                          | 200                                                                                                                   |                                                                                                                                                                                                                                                                                                       |                           |                            |                       |          |          |       |          |       |        |          |      |     |
| Definitive endoderm differentiation – gene expression    | Directed Differentiation Followed by qPCR                                     | Increased expression of additional endoderm lineage-specific marker relative to starting pluripotent cell population  | <table border="0"> <tr> <td><b>Gene</b></td> <td><b>Fold Induction</b></td> </tr> <tr> <td>GATA 6</td> <td>4,200</td> </tr> <tr> <td>GATA 4</td> <td>1,000</td> </tr> <tr> <td>FOXA2</td> <td>160</td> </tr> </table>                                                                                 | <b>Gene</b>               | <b>Fold Induction</b>      | GATA 6                | 4,200    | GATA 4   | 1,000 | FOXA2    | 160   |        |          |      |     |
| <b>Gene</b>                                              | <b>Fold Induction</b>                                                         |                                                                                                                       |                                                                                                                                                                                                                                                                                                       |                           |                            |                       |          |          |       |          |       |        |          |      |     |
| GATA 6                                                   | 4,200                                                                         |                                                                                                                       |                                                                                                                                                                                                                                                                                                       |                           |                            |                       |          |          |       |          |       |        |          |      |     |
| GATA 4                                                   | 1,000                                                                         |                                                                                                                       |                                                                                                                                                                                                                                                                                                       |                           |                            |                       |          |          |       |          |       |        |          |      |     |
| FOXA2                                                    | 160                                                                           |                                                                                                                       |                                                                                                                                                                                                                                                                                                       |                           |                            |                       |          |          |       |          |       |        |          |      |     |
| Definitive endoderm differentiation – protein expression | Directed Differentiation Followed by Flow cytometry                           | ≥ 80% of population is double positive for expression of DE markers (cKIT and CXCR4)                                  | <table border="0"> <tr> <td><b>% Expressing-cells</b></td> </tr> <tr> <td>99.7%</td> </tr> </table> (Histogram shown in Figure 1)                                                                                                                                                                     | <b>% Expressing-cells</b> | 99.7%                      |                       |          |          |       |          |       |        |          |      |     |
| <b>% Expressing-cells</b>                                |                                                                               |                                                                                                                       |                                                                                                                                                                                                                                                                                                       |                           |                            |                       |          |          |       |          |       |        |          |      |     |
| 99.7%                                                    |                                                                               |                                                                                                                       |                                                                                                                                                                                                                                                                                                       |                           |                            |                       |          |          |       |          |       |        |          |      |     |
| Mycoplasma                                               | Lonza MycoAlert Plus kit                                                      | None detected                                                                                                         | None detected                                                                                                                                                                                                                                                                                         |                           |                            |                       |          |          |       |          |       |        |          |      |     |
| Identity                                                 | STR: PCR profiling of 9 STR regions plus Amelogenin for gender determination. | Consistent with expected <sup>1</sup>                                                                                 | Consistent with parental - Amel: XX<br>CSF1PO:10,12 D21S11:27,30 TH01:6,8<br>D13S317:8,14 D5S818:11,13 TPOX: 8,11<br>D16S539:8,13 D7S820:11,12 vWA:16,19                                                                                                                                              |                           |                            |                       |          |          |       |          |       |        |          |      |     |
| Karyotype                                                | G-banding analysis detecting structural abnormality of size >3-10Mb           | Normal karyotype, 46 XX or 46 XY<br>19/20 cells normal <sup>2</sup>                                                   | Normal karyotype, 46 XX at passage 3+5                                                                                                                                                                                                                                                                |                           |                            |                       |          |          |       |          |       |        |          |      |     |
| Post-Thaw Viability                                      | Cell count and viability using Nucleocounter                                  | Viable cell count and viability within 7 days post thaw                                                               | <table border="0"> <tr> <td>Viable cell count</td> <td>5.02E+05</td> </tr> <tr> <td>Viability</td> <td>88.7%</td> </tr> </table>                                                                                                                                                                      | Viable cell count         | 5.02E+05                   | Viability             | 88.7%    |          |       |          |       |        |          |      |     |
| Viable cell count                                        | 5.02E+05                                                                      |                                                                                                                       |                                                                                                                                                                                                                                                                                                       |                           |                            |                       |          |          |       |          |       |        |          |      |     |
| Viability                                                | 88.7%                                                                         |                                                                                                                       |                                                                                                                                                                                                                                                                                                       |                           |                            |                       |          |          |       |          |       |        |          |      |     |
| Residual Sendai                                          | RT-PCR against Sendai viral elements                                          | None detected in PCR amplification                                                                                    | None detected                                                                                                                                                                                                                                                                                         |                           |                            |                       |          |          |       |          |       |        |          |      |     |

## Supplementary Tables 8. Authentication of new iPSC lines

### CF02MC

| Test Description                                      | Method                                                                                 | Expected Result                                                                                                       | Result                                                                                                                                                                                                                                                                                                                    |                   |                     |           |       |          |       |        |       |      |       |
|-------------------------------------------------------|----------------------------------------------------------------------------------------|-----------------------------------------------------------------------------------------------------------------------|---------------------------------------------------------------------------------------------------------------------------------------------------------------------------------------------------------------------------------------------------------------------------------------------------------------------------|-------------------|---------------------|-----------|-------|----------|-------|--------|-------|------|-------|
| <b>Expression of pluripotency-associated proteins</b> | Flow cytometry                                                                         | ≥ 80% of population is positive for expression of surface markers (SSEA4, Tra-1-60), and intracellular marker (OCT4). | <table border="1"> <thead> <tr> <th>Antigen</th> <th>% Expressing-cells</th> </tr> </thead> <tbody> <tr> <td>SSEA4</td> <td>94.1%</td> </tr> <tr> <td>Tra-1-60</td> <td>87.4%</td> </tr> <tr> <td>OCT4</td> <td>99.9%</td> </tr> <tr> <td>SOX2</td> <td>99.7%</td> </tr> </tbody> </table> (Histograms shown in Figure 1) | Antigen           | % Expressing-cells  | SSEA4     | 94.1% | Tra-1-60 | 87.4% | OCT4   | 99.9% | SOX2 | 99.7% |
| Antigen                                               | % Expressing-cells                                                                     |                                                                                                                       |                                                                                                                                                                                                                                                                                                                           |                   |                     |           |       |          |       |        |       |      |       |
| SSEA4                                                 | 94.1%                                                                                  |                                                                                                                       |                                                                                                                                                                                                                                                                                                                           |                   |                     |           |       |          |       |        |       |      |       |
| Tra-1-60                                              | 87.4%                                                                                  |                                                                                                                       |                                                                                                                                                                                                                                                                                                                           |                   |                     |           |       |          |       |        |       |      |       |
| OCT4                                                  | 99.9%                                                                                  |                                                                                                                       |                                                                                                                                                                                                                                                                                                                           |                   |                     |           |       |          |       |        |       |      |       |
| SOX2                                                  | 99.7%                                                                                  |                                                                                                                       |                                                                                                                                                                                                                                                                                                                           |                   |                     |           |       |          |       |        |       |      |       |
| <b>Gene expression of pluripotency markers</b>        | qRT-PCR                                                                                | ≥ 80% expression measured in hESC reference standard (HES2 hESCs on Matrigel).                                        | <table border="1"> <thead> <tr> <th>Gene</th> <th>Relative Expression</th> </tr> </thead> <tbody> <tr> <td>OCT4</td> <td>134%</td> </tr> <tr> <td>NANOG</td> <td>177%</td> </tr> <tr> <td>DNMT3B</td> <td>141%</td> </tr> </tbody> </table>                                                                               | Gene              | Relative Expression | OCT4      | 134%  | NANOG    | 177%  | DNMT3B | 141%  |      |       |
| Gene                                                  | Relative Expression                                                                    |                                                                                                                       |                                                                                                                                                                                                                                                                                                                           |                   |                     |           |       |          |       |        |       |      |       |
| OCT4                                                  | 134%                                                                                   |                                                                                                                       |                                                                                                                                                                                                                                                                                                                           |                   |                     |           |       |          |       |        |       |      |       |
| NANOG                                                 | 177%                                                                                   |                                                                                                                       |                                                                                                                                                                                                                                                                                                                           |                   |                     |           |       |          |       |        |       |      |       |
| DNMT3B                                                | 141%                                                                                   |                                                                                                                       |                                                                                                                                                                                                                                                                                                                           |                   |                     |           |       |          |       |        |       |      |       |
| <b>Mycoplasma</b>                                     | Lonza MycoAlert Plus kit                                                               | None detected                                                                                                         | None detected                                                                                                                                                                                                                                                                                                             |                   |                     |           |       |          |       |        |       |      |       |
| <b>Identity</b>                                       | STR: PCR profiling of 9 STR regions plus Amelogenin for gender determination.          | Consistent with expected <sup>1</sup>                                                                                 | Consistent with parental - Amel: XX<br>CSF1PO:10,12 D21S11:27,30 TH01:6,8<br>D13S317:8,14 D5S818:11,13 TPOX: 8,11<br>D16S539:8,13 D7S820:11,12 vWA:16,19                                                                                                                                                                  |                   |                     |           |       |          |       |        |       |      |       |
| <b>Karyotype</b>                                      | G-banding analysis detecting structural abnormality of size >3-10Mb                    | Normal karyotype, 46 XX or 46 XY<br>19/20 cells normal <sup>2</sup>                                                   | Normal karyotype, 46 XX at passage P3+34                                                                                                                                                                                                                                                                                  |                   |                     |           |       |          |       |        |       |      |       |
| <b>Post-Thaw Viability</b>                            | Cell count and viability using Nucleocounter                                           | Viable cell count and viability within 7 days post thaw                                                               | <table border="1"> <tbody> <tr> <td>Viable cell count</td> <td>2.94E6</td> </tr> <tr> <td>Viability</td> <td>90.3%</td> </tr> </tbody> </table>                                                                                                                                                                           | Viable cell count | 2.94E6              | Viability | 90.3% |          |       |        |       |      |       |
| Viable cell count                                     | 2.94E6                                                                                 |                                                                                                                       |                                                                                                                                                                                                                                                                                                                           |                   |                     |           |       |          |       |        |       |      |       |
| Viability                                             | 90.3%                                                                                  |                                                                                                                       |                                                                                                                                                                                                                                                                                                                           |                   |                     |           |       |          |       |        |       |      |       |
| <b>Sequence confirmation</b>                          | PCR and Sanger sequencing of targeted locus                                            | Desired mutation                                                                                                      | Full sequence of wild-type and targeted allele show no aberrant mutations (Figure 2)                                                                                                                                                                                                                                      |                   |                     |           |       |          |       |        |       |      |       |
| <b>Off-target analysis</b>                            | PCR and Sanger sequencing of genomic sites likely to be subject to off-target cleavage | No mutations in putative off-target cut sites                                                                         | Sequenced 5 genomic sites most likely to be inappropriately cut by designed gRNA and found no aberrant mutations (Table 1)                                                                                                                                                                                                |                   |                     |           |       |          |       |        |       |      |       |
| <b>Clonal Population</b>                              | TIDER analysis of sequencing trace                                                     | >80% HDR efficiency indicates homozygous, single cell clonality                                                       | 96.0% HDR efficiency (Figure 2C)                                                                                                                                                                                                                                                                                          |                   |                     |           |       |          |       |        |       |      |       |

| iPSC lines | Authentication Date |
|------------|---------------------|
| WT01       | 2015-09-28          |
| CF01a      | 2017-03-03          |
| CF01b      | 2017-03-03          |
| CF01MC     | 2018-02-14          |
| CF02a      | 2017-03-03          |
| CF02b      | 2017-03-03          |
| CF02MC     | 2019-05-10          |



**Supplementary Figure 12a MC Uncropped western blots**

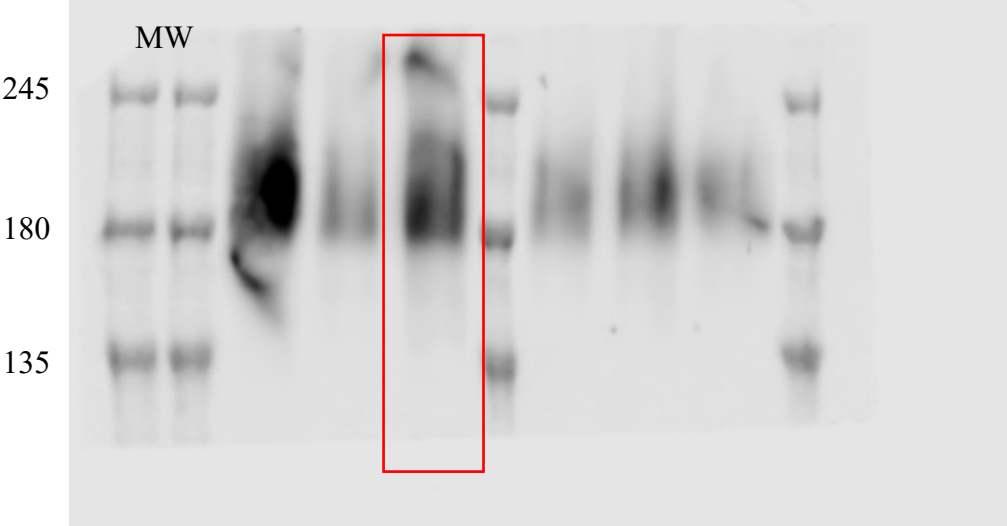

Wt CFTR

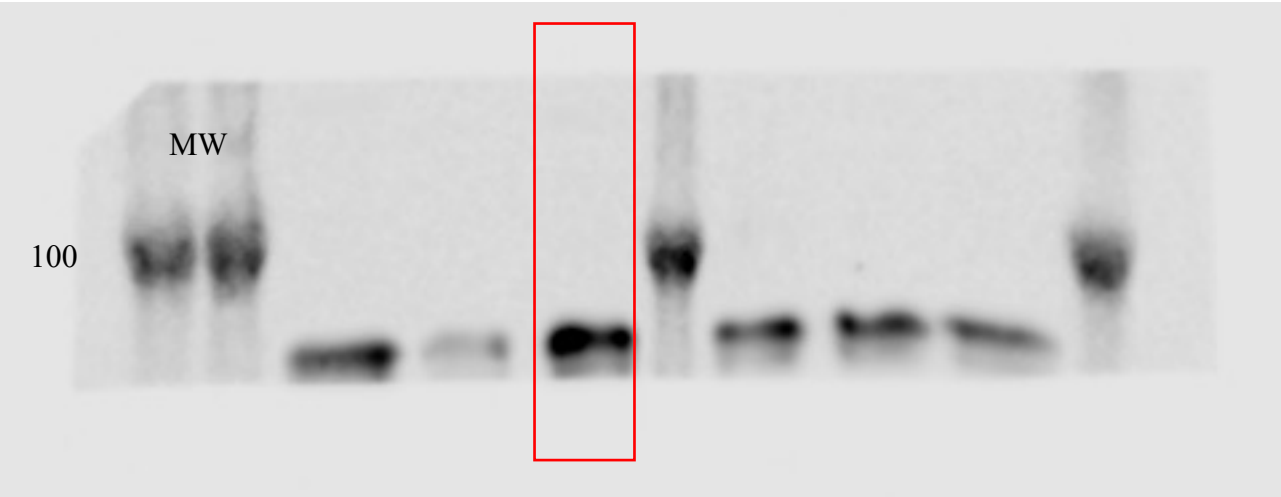

Calnexin

Supplementary Figure 12a CF Uncropped western blots

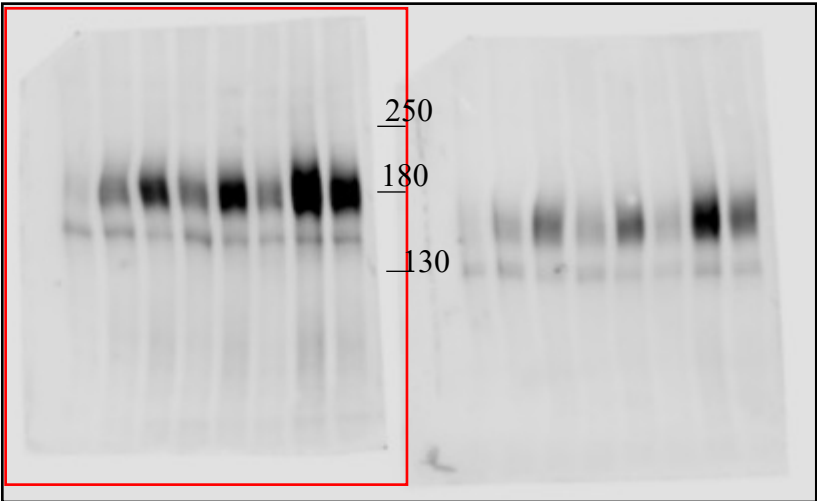

F508del CFTR

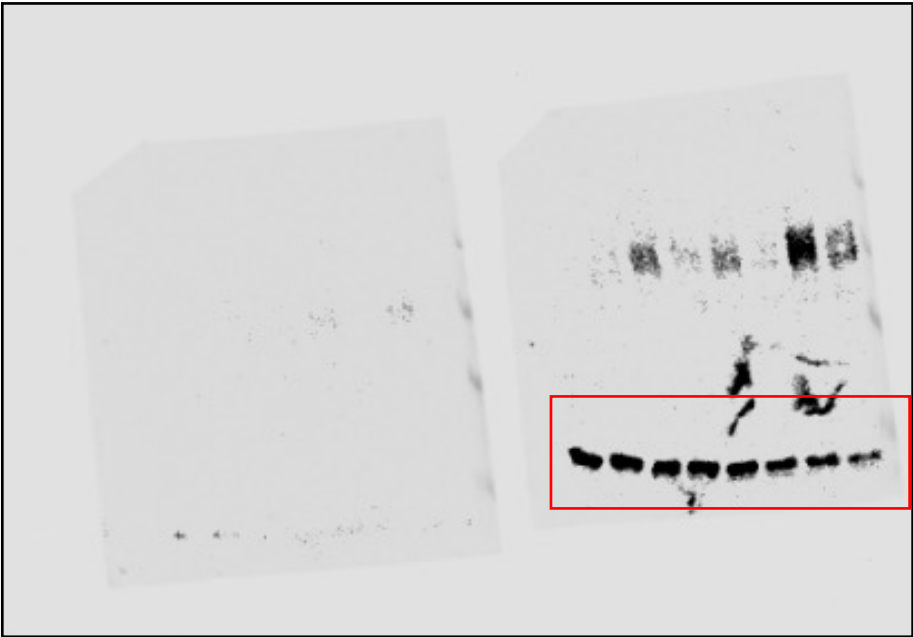

Calnexin

**Supplementary Figure 12c MC Uncropped western blots**

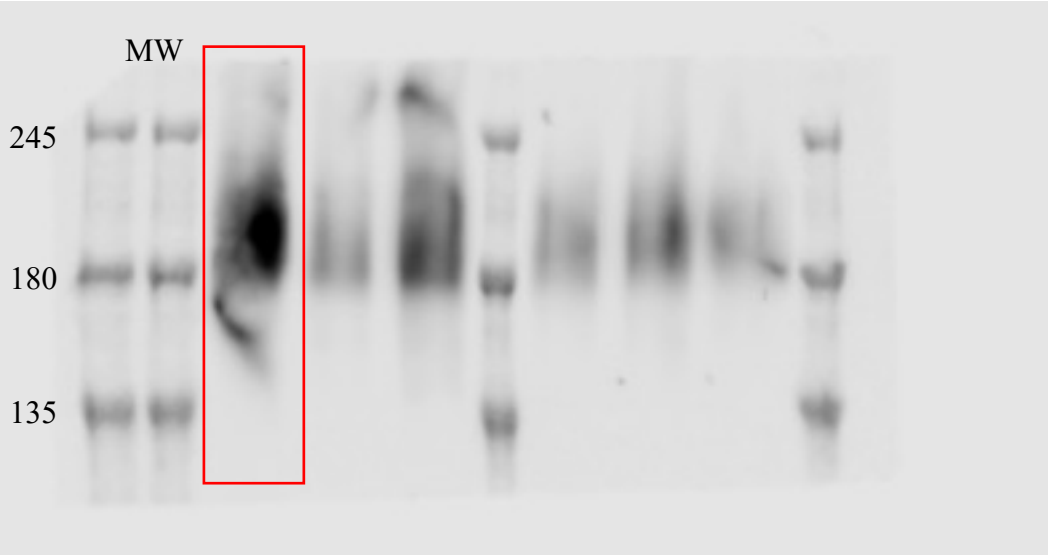

CFTR

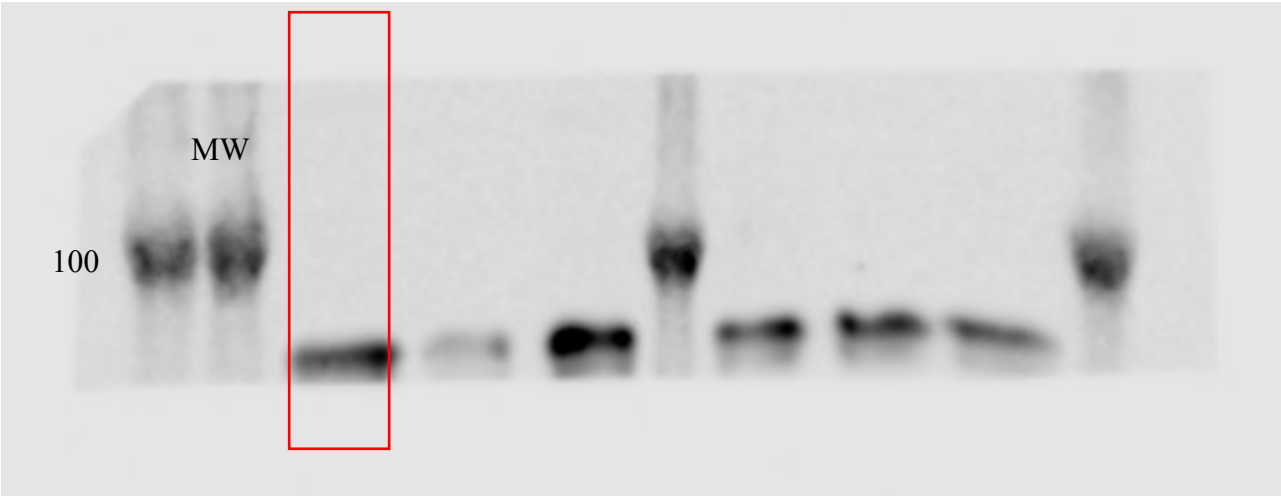

Calnexin

Supplementary Figure 12c CF Uncropped western blots

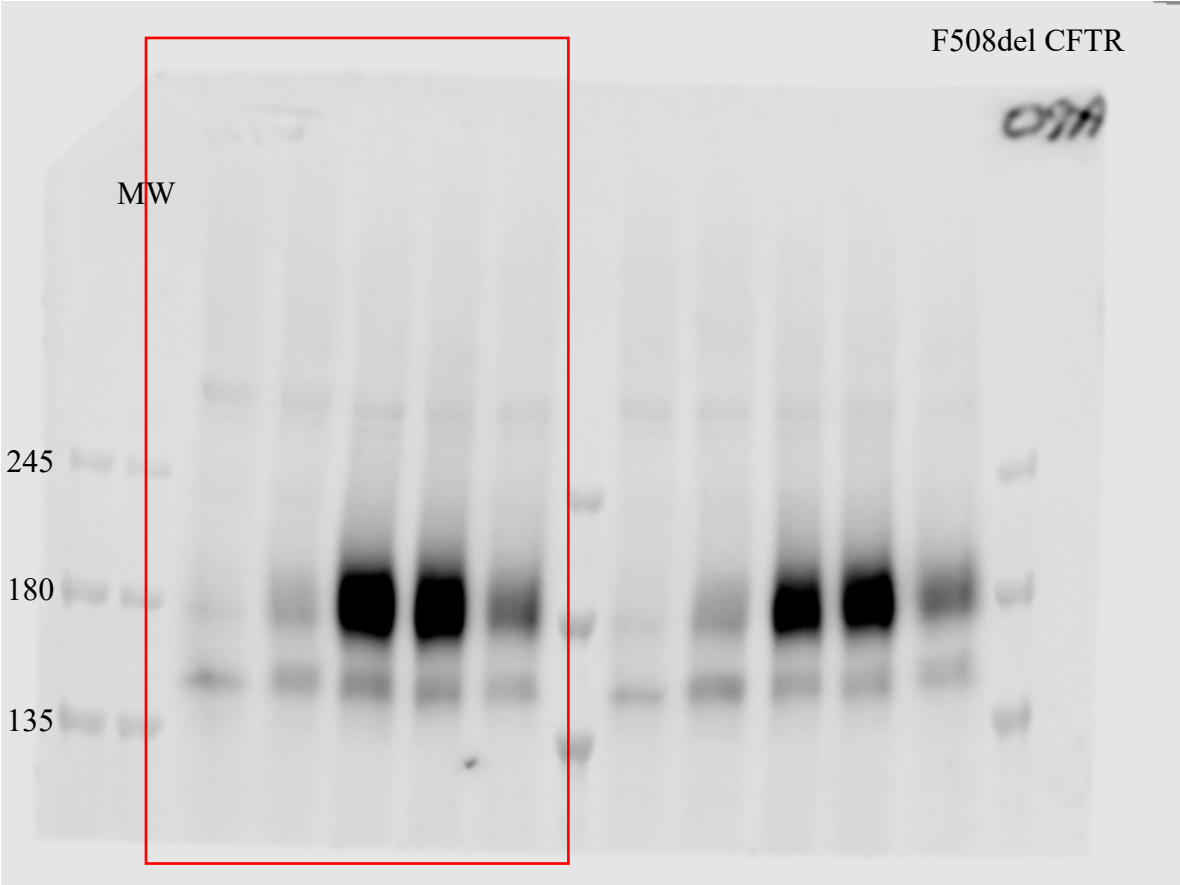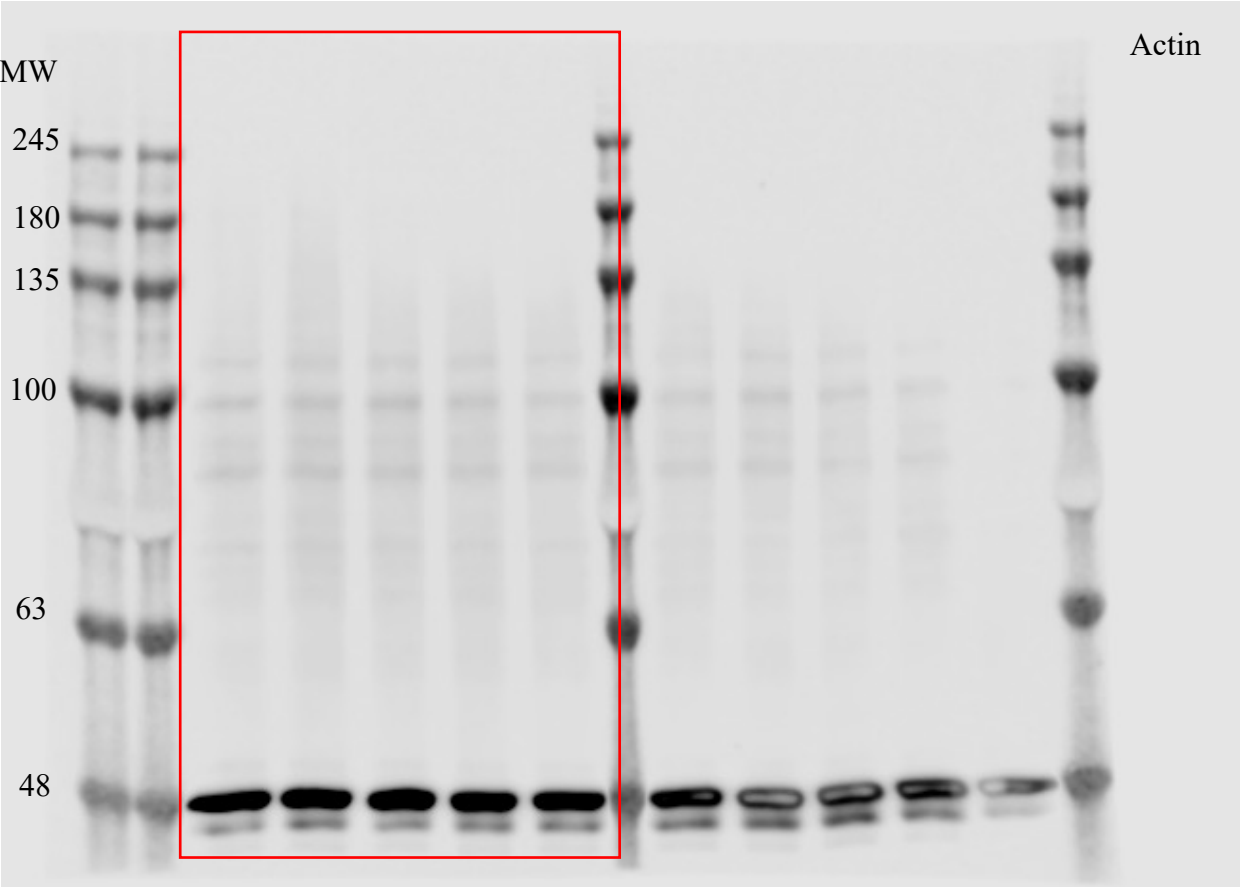

**Supplementary Figure 12e CF Uncropped western blots**

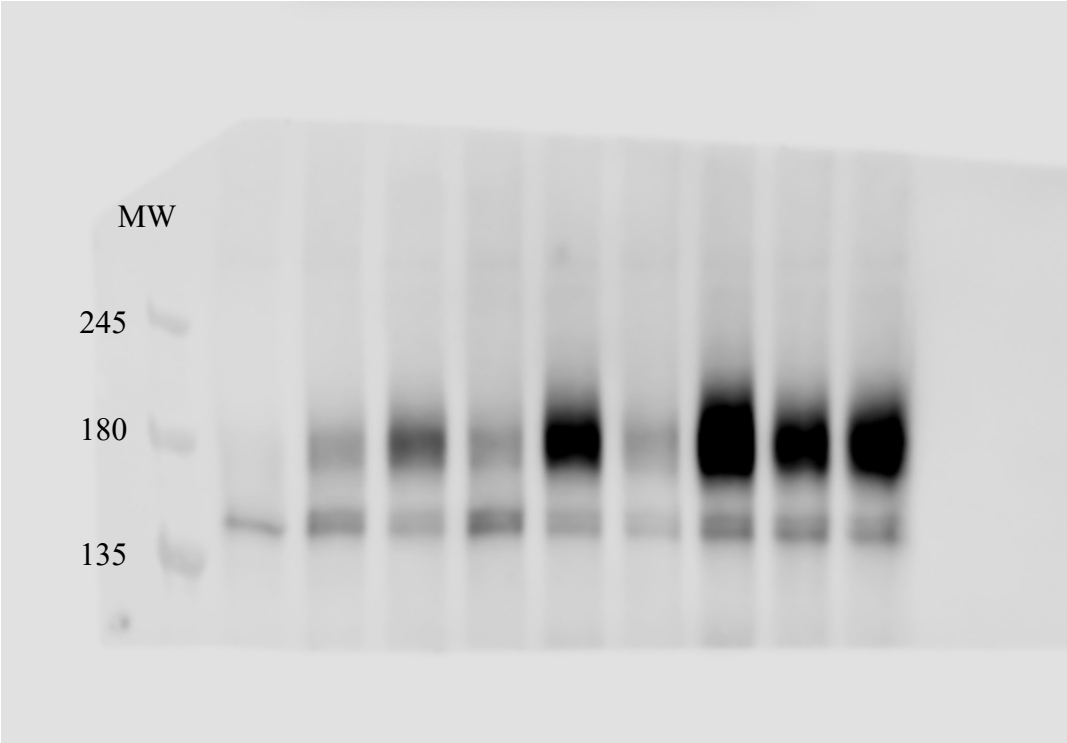

F508del CFTR

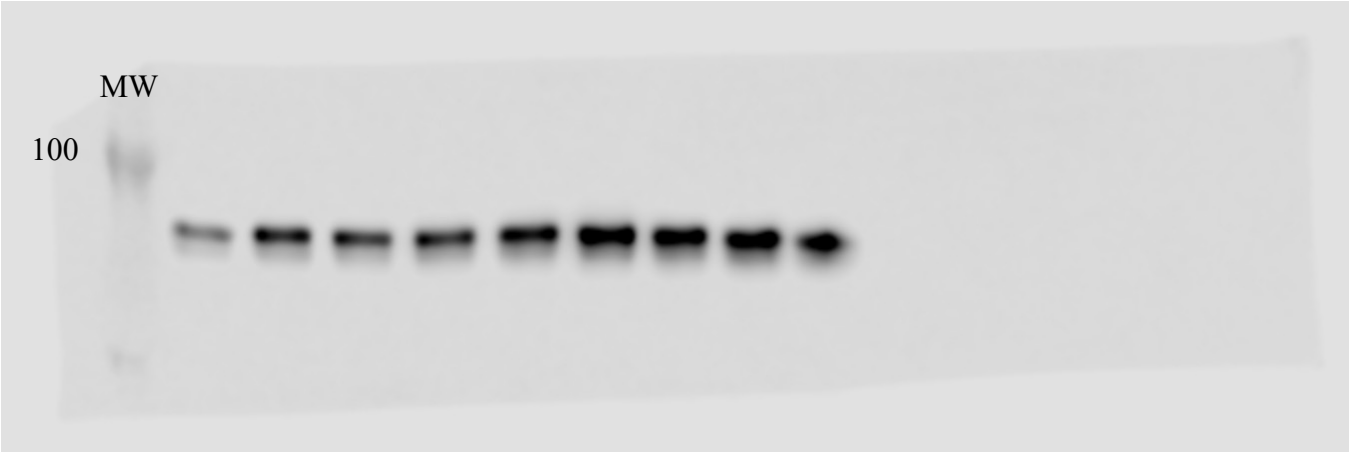

Actin

**Supplementary Figure 12g MC Uncropped western blots**

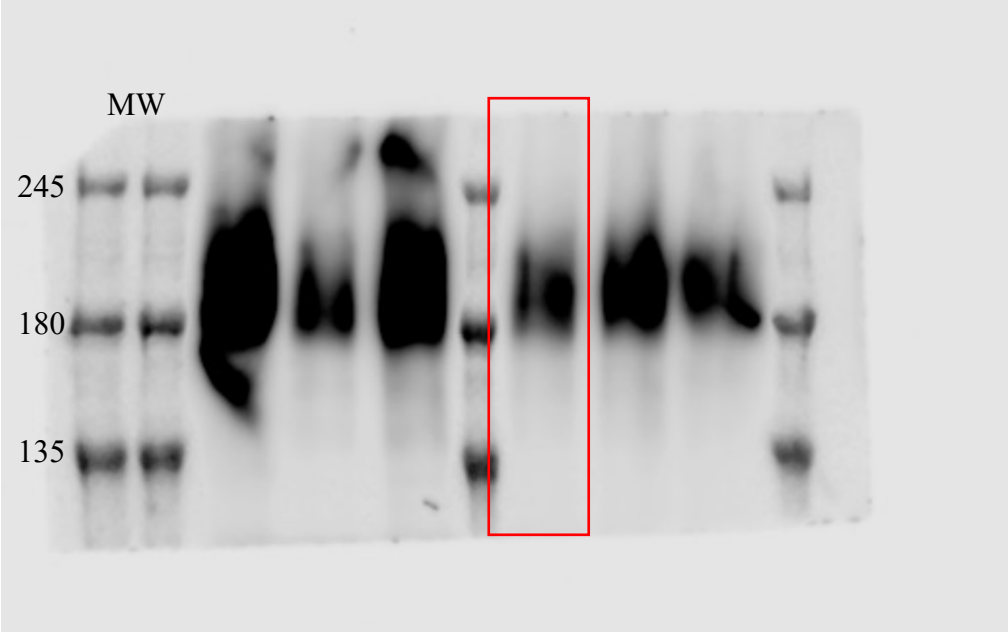

CFTR

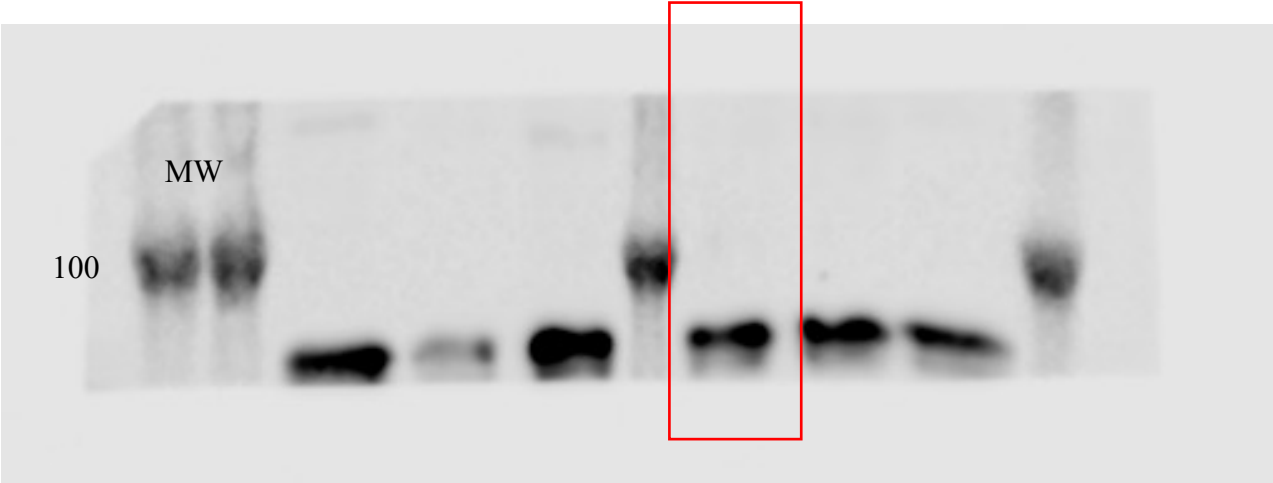

Calnexin

Supplementary Figure 12g CF Uncropped western blots

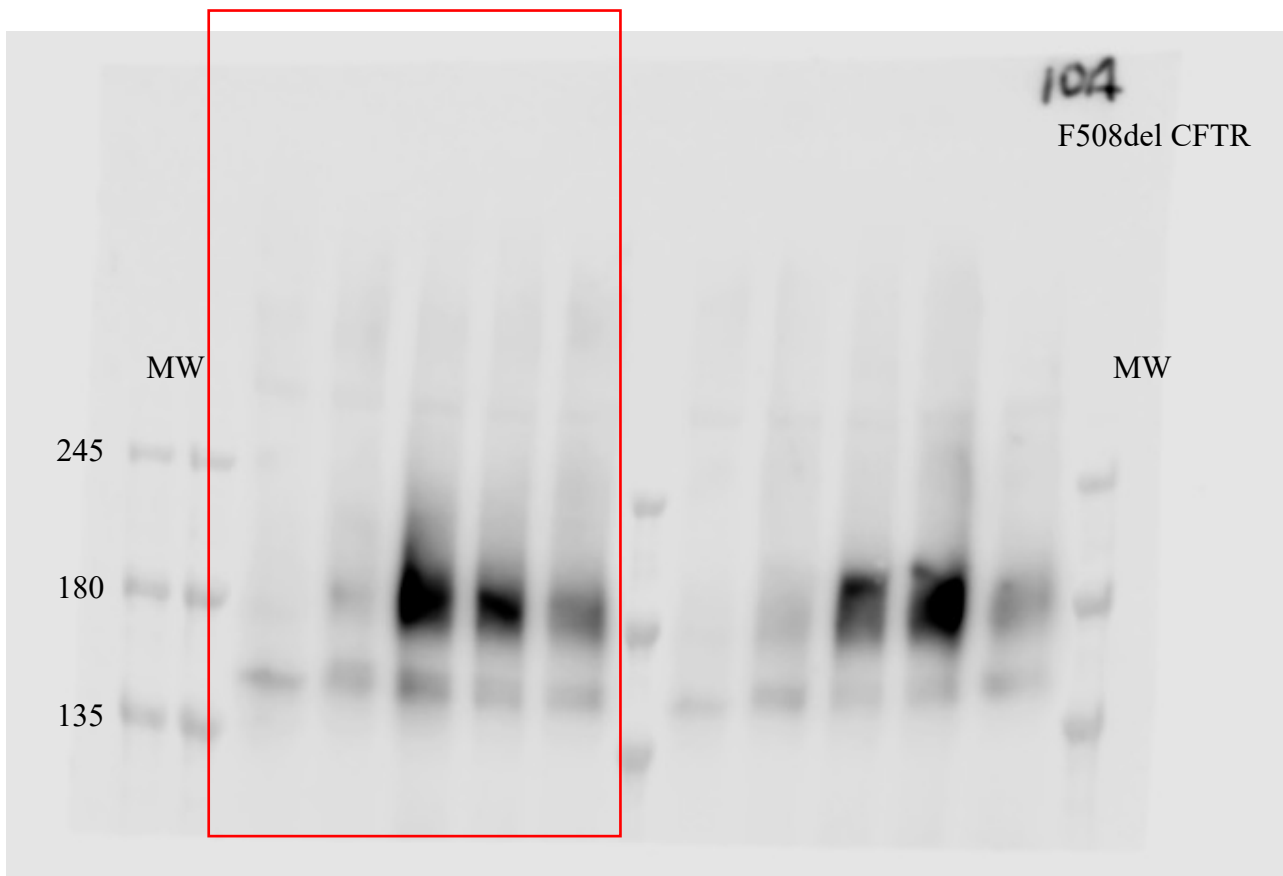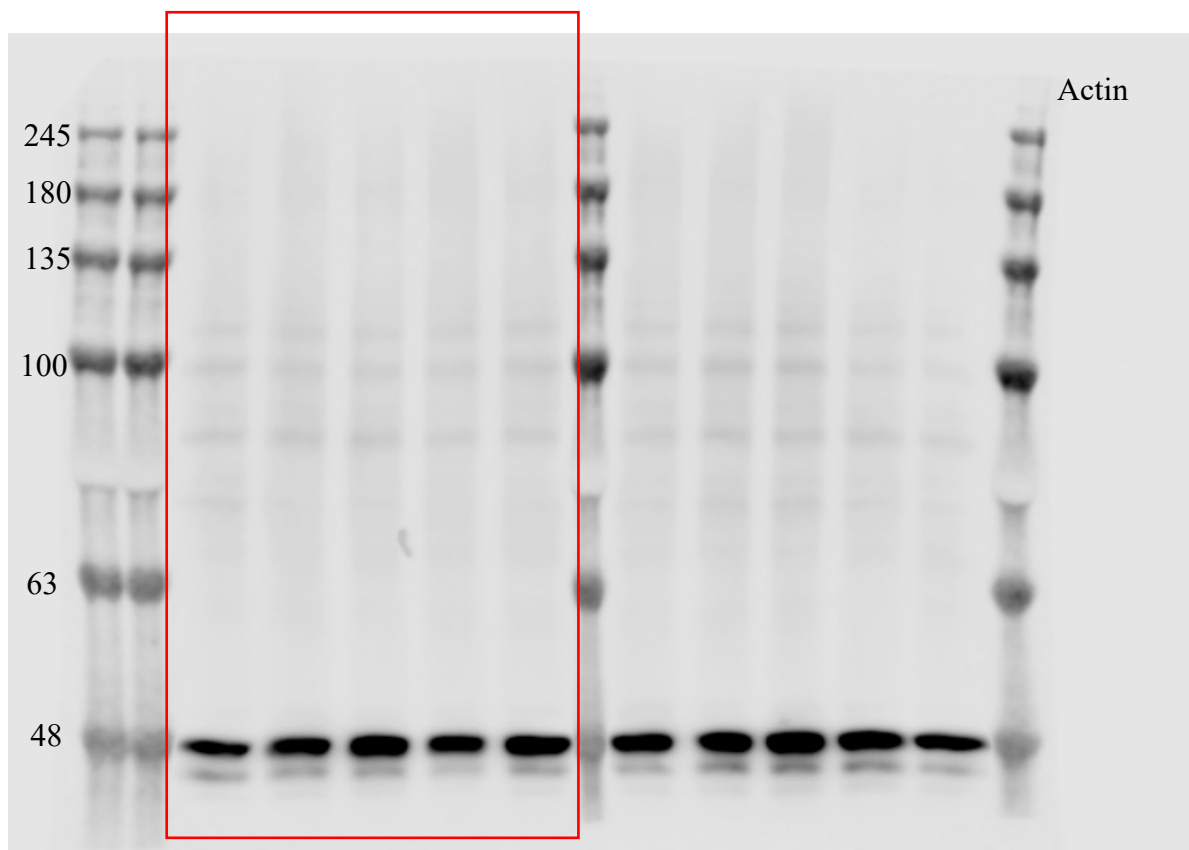

Supplement: 41467_2021_26764_MOESM1_ESM.pdf [file 41467_2021_26764_MOESM1_ESM.pdf]
